# Supplementary material for: Solid-state [2+2] photodimerization of eniminium salts: stereoselective syntheses of 1,3-diacetylcyclobutanes
Source: Royal Society of Chemistry journal article supplement (doi:10.1039/d4cc03691c), 2024-01-01

## Supporting Information

### Solid-state [2+2] photodimerization of eniminium salts: stereoselective synthesis of 1,3-diacetylcyclobutanes

Shinji Yamada\* and Yuka Honda

#### Table of Contents

|                                                                                                                    |     |
|--------------------------------------------------------------------------------------------------------------------|-----|
| 1. General experimental procedures                                                                                 | S1  |
| 2. General procedure for synthesis of eniminium salts and spectral data for <b>2a</b> and <b>3a-3h</b>             | S3  |
| 3. General procedure for irradiation of eniminium salts in the solid-state                                         | S6  |
| 4. Control experiments of irradiation of $\alpha,\beta$ -unsaturated ketones in the solid-state                    | S7  |
| 5. Attempt on hydrolysis of photodimers to diacetylcyclobutanes                                                    | S8  |
| 6. General procedure of hydrolysis of photodimers and spectral data for <b>6a-6h</b>                               | S9  |
| 7. Details of computational methods                                                                                | S13 |
| 8. Synthesis of dimer derivatives <b>7b</b> , <b>8b</b> and <b>9b</b>                                              | S15 |
| 9. $^1\text{H}$ NMR spectra for <b>2a</b> , <b>3a-3h</b> , <b>5b</b> and <b>6a-6h</b>                              | S17 |
| 10. X-ray crystallographic data for <b>2a</b> , <b>3a-3h</b> and <b>6a-6h</b> , and their crystal packing diagrams | S31 |

## 1. General Information.

Unless otherwise noted, reagents and starting materials were purchased from traditional suppliers and were used without further purification. Column chromatography was carried out using silica gel 60 N. TLC was carried out on silica gel 60 PF<sub>254</sub>. IR spectra were recorded as KBr pellets or neat films between NaCl plates, or using an ATR attachment. <sup>1</sup>H NMR spectra were obtained at 400, 500 or 600 MHz as dilute solution in CDCl<sub>3</sub> and CD<sub>3</sub>CN. The chemical shifts were reported relative to internal TMS. <sup>13</sup>C NMR spectra were obtained at 100 or 150 MHz as dilute solution in CDCl<sub>3</sub> and CD<sub>3</sub>CN, and the chemical shifts were reported relative to internal TMS. The measurement of the distances between the coupled peaks with a scale gave the J values within the error of ±0.02 Hz. High- and low- resolution mass spectra were recorded on LC-MS using ESI ionization mode. X-ray measurements at 123 K were carried out using an imaging plate area detector with graphite monochromated Cu-K $\alpha$  radiation. All calculations were performed using the CrystalStructure crystallographic software package except for refinement, which was performed using SHELXL-2013. The raw data frames were integrated with the SAINT+ program by using a narrow-frame integration algorithm. All structures were solved by a combination of direct methods and difference Fourier syntheses, and refined by full- matrix least-squares on F<sup>2</sup>, by using the SHELXTL software package.

## 2. General procedure for synthesis of eniminium salts and spectral data for 2a and 3a-3h

### 2.1 Synthesis of (*E*)-*N*-(1-methyl-3-phenyl-2-propen-1-ylidene)-*N*-methylmethanaminium trifluoromethanesulfonate 2a

To a solution of (*E*)-4-phenylbut-3-en-2-one (222.1 mg, 1.5 mmol) and *N*-trimethylsilyl dimethylamine (248  $\mu$ L, 1.6 mmol) in dry diethyl ether (4.5 mL) was added dropwise trimethylsilyl trifluoromethanesulfonate (286  $\mu$ L, 1.6 mmol). After stirred for 5h at room temperature, the precipitate was filtered and the solid was washed with diethyl

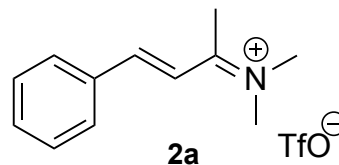

ether. Recrystallization of the solid from dichloromethane/diethyl ether gave **2a** in 30% yield (148.4 mg, 0.45 mmol). Colorless crystal. mp 119.5-121.0  $^{\circ}$ C. IR (ATR) 1618, 1595, 355, 1262, 1223, 1190, 1180, 1141, 1079, 1032, 965, 766, 692, 634, 619, 572, 517, 477  $\text{cm}^{-1}$ .  $^1\text{H}$  NMR (500MHz,  $\text{CD}_3\text{CN}$ )  $\delta$  2.57 (s, 3H), 3.54 (s, 3H), 3.62 (s, 3H), 7.26 (d,  $J$  = 15.8 Hz, 1H), 7.50-7.56 (m, 3H), 7.81 (d,  $J$  = 7.2 Hz, 2H), 7.94 (d,  $J$  = 15.8 Hz, 1H).  $^{13}\text{C}$  NMR (150 MHz,  $\text{CD}_3\text{CN}$ )  $\delta$  18.9, 45.2, 46.1, 119.5, 122.0 ( $J$  = 320 Hz), 130.2, 130.5, 133.5, 134.8, 153.4, 178.8. HRMS (ESI-QTOF): calcd for  $\text{C}_{12}\text{H}_{16}\text{N} [\text{M}^+]$ : 174.1277, found 174.1279.

### 2.2 General procedure for synthesis of (*E*)-1-(4-Aryl-3-buten-2-ylidene) pyrrolidine tetrafluoroborates 3a-3h.

To a solution of pyrrolidine tetrafluoroborate (345 mg, 2.17 mmol) and (*E*)-4-phenyl-3-buten-2-one (268 mg, 1.84 mmol) in ethanol (1.0 mL) was added triethylamine (25  $\mu$ L, 0.18 mmol). After stirring the solution for 18h at rt, the precipitate was filtered and washed with ethanol. The solid was recrystallized from dichloromethane or acetonitrile/ethanol to give **3a** (228 mg, 0.79 mmol) in 43% yield.

Eniminium salt **3a**<sup>1,2</sup>: Colorless crystal, 43% yield.  $^1\text{H}$  NMR (600MHz,  $\text{CD}_3\text{CN}$ )  $\delta$  2.09-2.14 (m, 4H), 2.56 (s, 3H), 3.92 (t,  $J$  = 6.3 Hz, 2H), 4.04 (t,  $J$  = 6.3 Hz, 2H), 7.15 (d,  $J$  = 15.6 Hz, 1H), 7.50-7.53 (m, 2H), 7.55-7.80 (m, 1H), 7.81 (d,  $J$  = 7.2 Hz, 2H), 7.93 (d,  $J$  = 15.6 Hz, 1H). X-ray crystallographic analysis evidenced the structure (ESI, p.S33).

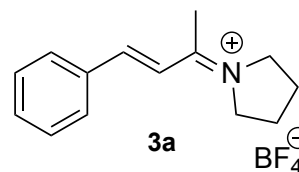

Eniminium salt **3b**: Yellow crystal, 27 % yield. mp 180.1-181.2  $^{\circ}$ C. IR (ATR) 1624 1593 1510 1441 1325 1235 1163 1096 1047 1034 978 955 928 833 513  $\text{cm}^{-1}$ .  $^1\text{H}$  NMR (600MHz,  $\text{CD}_3\text{CN}$ )  $\delta$  2.11-2.13 (m, 4H), 2.55 (s, 3H), 3.92 (t,  $J$  = 6.6 Hz, 2H), 4.03-4.05 (m, 2H), 7.09 (d,  $J$  = 16.2 1H), 7.27 (t,  $J$  = 8.7

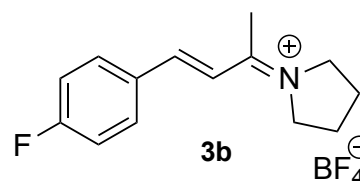

Hz, 2H), 7.86-7.89 (m, 2H) 7.91 (d,  $J = 16.2$  Hz, 1H).  $^{13}\text{C}$  NMR (150 MHz,  $\text{CD}_3\text{CN}$ )  $\delta$  19.3, 24.9 25.2, 54.6, 55.5, 117.3 ( $J = 22.5$  Hz), 120.2, 131.3, 133.0 ( $J = 10.5$  Hz), 151.2, 166.0 ( $J = 251$  Hz), 174.8. HRMS (EIS-QTOF) calcd for  $\text{C}_{14}\text{H}_{17}\text{FN}$  [ $\text{M}^+$ ]: 218,1340 found 218.1343.

Eniminium salt **3c**: Colorless crystal, 33% yield. mp 175.3-176.3 °C.

IR (ATR) 1614 1595 1445 1387 1327 1047 1034 959 930 839 777 520  $\text{cm}^{-1}$ .  $^1\text{H}$  NMR (600MHz,  $\text{CD}_3\text{CN}$ )  $\delta$  2.12-2.13 (m, 4H), 2.51 (s, 3H), 2.59 (s, 3H), 3.94 (t,  $J = 6.3$  Hz, 2H), 4.04-4.06 (m, 2H), 7.08 (d,  $J = 15.6$  Hz, 1H), 7.32-7.34 (m, 2H), 7.43-7.45 (m, 1H), 7.85 (d,  $J = 7.8$  Hz, 1H), 8.13 (d,  $J = 15.6$  Hz, 1H).

$^{13}\text{C}$  NMR (150 MHz,  $\text{CD}_3\text{CN}$ )  $\delta$  19.5, 19.7, 24.9, 25.2, 54.7, 55.6, 121.3, 127.6, 128.4, 132.1, 133.2, 133.6, 140.6, 149.8, 175.0. HRMS (EIS-QTOF) calcd for  $\text{C}_{15}\text{H}_{20}\text{N}$  [ $\text{M}^+$ ]: 214.1590, found 214.1593.

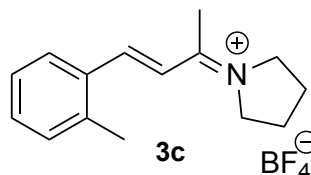

Eniminium salt **3d**: Colorless crystal, 39% yield. mp 166.9-168.3 °C.

IR (ATR) 1622 1332 1090 1049 1035 972 791 694 518  $\text{cm}^{-1}$ .  $^1\text{H}$  NMR (600MHz,  $\text{CD}_3\text{CN}$ )  $\delta$  2.10-2.13 (m, 4H), 2.40 (s, 3H), 2.56 (s, 3H), 3.92 (t,  $J = 6.3$  Hz, 2H), 4.04 (t,  $J = 6.3$  Hz, 3H), 7.15 (d,  $J = 15.6$  Hz, 1H), 7.38-7.42(m, 2H), 7.60 (d,  $J = 7.2$  Hz, 1H), 7.67 (s, 1H), 7.90 (d,  $J = 15.6$  Hz, 1H).

$^{13}\text{C}$  NMR (150 MHz,  $\text{CD}_3\text{CN}$ )  $\delta$  19.3, 21.1, 24.9, 25.2, 54.6, 55.5, 120.2, 128.0, 130.1, 130.7, 134.3, 134.8, 140.2, 152.8, 174.9. HRMS (EIS-QTOF) calcd for  $\text{C}_{15}\text{H}_{20}\text{N}$  [ $\text{M}^+$ ]: 214.1590, found 214.1594.

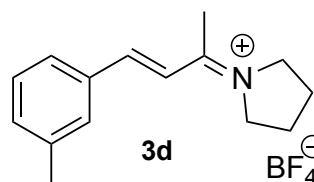

Eniminium salt **3e**: Colorless crystal, 30% yield. mp 187.1-

188.4°C. IR (ATR) 2359 2342 1622 1599 1441 1329 1188 1093 1049 1033 976 957 925 816 495  $\text{cm}^{-1}$ .  $^1\text{H}$  NMR (600MHz,  $\text{CD}_3\text{CN}$ )  $\delta$  2.10-2.13 (m, 4H), 2.41 (s, 3H), 2.54 (s, 3H), 3.91 (t,  $J = 6.6$  Hz, 2H), 4.02 (t,  $J = 6.6$  Hz, 3H), 7.10 (d,  $J = 15.6$  Hz, 2H), 7.35 (d,  $J = 7.8$  Hz, 2H), 7.71 (d,  $J = 8.4$  Hz, 2H), 7.91 (d,  $J = 15.6$  Hz, 1H).

$^{13}\text{C}$  NMR (150 MHz,  $\text{CD}_3\text{CN}$ )  $\delta$  19.2, 21.6, 24.9, 25.2, 54.5, 55.4, 119.2, 130.6, 130.9, 132.1, 144.9, 152.8, 174.8. HRMS (ESI-QTOF): calcd for  $\text{C}_{15}\text{H}_{20}\text{N}$  [ $\text{M}^+$ ]: 214.1590, found 214.1593.

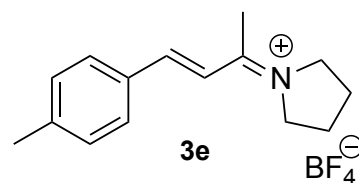

Eniminium salt **3f**: Yellow crystal, 34 % yield. mp 156.1-

156.9 °C. IR (ATR) 1584 1568 1514 1464 1427 1321 1252 1179 1092 1049 1017 1004 982 943 831 816 598 556 521  $\text{cm}^{-1}$ .  $^1\text{H}$  NMR (400MHz,  $\text{CD}_3\text{CN}$ )  $\delta$  2.09-2.11 (m, 4H), 2.52 (s, 3H), 3.86 (s, 3H), 3.89 (t,  $J = 4.3$  Hz, 2H), 3.99 (t,  $J = 4.3$  Hz,

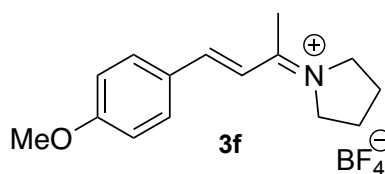



2H), 6.99 (d,  $J = 15.6$  Hz, 1H), 7.05 (d,  $J = 8.8$  Hz, 2H), 7.78 (d,  $J = 8.4$  Hz, 2H), 7.88 (d,  $J = 15.6$  Hz, 1H).  $^{13}\text{C}$  NMR (150 MHz,  $\text{CD}_3\text{CN}$ )  $\delta$  19.1, 25.0, 25.3, 54.3, 55.2, 56.4, 115.8, 117.6, 127.5, 132.9, 152.7, 164.5, 174.5. HRMS (EIS-QTOF) calcd for  $\text{C}_{15}\text{H}_{20}\text{NO}$  [ $\text{M}^+$ ]: 230.1539, found 230.1545.

Eniminium salt **3g**: Yellow crystal, 78 % yield. mp 193.8-194.7 °C. IR (ATR) 1620 1603 1580 1503 1458 1423 1316 1285 1254 1161 1121 1045 1024 997 972 922 874 835 787 664 594 512 428  $\text{cm}^{-1}$ .  $^1\text{H}$  NMR (400MHz,  $\text{CD}_3\text{CN}$ )  $\delta$  2.28-2.34 (m, 4H), 2.52

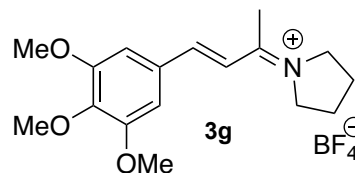

(s, 3H), 3.80 (s, 3H), 3.88 (s, 6H), 4.11 (t,  $J = 6.4$  Hz, 2H), 4.24 (t,  $J = 6.4$  Hz, 2H), 7.02 (d,  $J = 15.6$  Hz, 1H), 7.27 (s, 2H), 7.79 (d,  $J = 15.6$  Hz, 1H).  $^{13}\text{C}$  NMR (150 MHz,  $\text{CD}_3\text{CN}$ )  $\delta$  19.3, 25.0, 25.3, 54.6, 55.5, 57.0, 61.1, 108.2, 119.4, 130.3, 143.0, 152.9, 154.6, 1774.7. HRMS (EIS-QTOF) calcd for  $\text{C}_{17}\text{H}_{24}\text{NO}_3$  [ $\text{M}^+$ ]: 290.1751, found 290.1755.

Eniminium salt **3h**: Red crystal, 44 % yield. mp 184.0-185.4°C.

IR (ATR) 3626 3557 2915 1566 1530 1441 1368 1310 1294 1188 1167 1101 1057 1026 988 943 916 828 814 760 702 515  $\text{cm}^{-1}$ .  $^1\text{H}$  NMR (600MHz,  $\text{CD}_3\text{CN}$ )  $\delta$  2.06-2.08 (m, 4H), 2.47 (s, 3H), 3.09 (s, 6H), 3.84 (t,  $J = 6.6$  Hz, 2H), 3.91 (t,  $J = 6.6$  Hz,

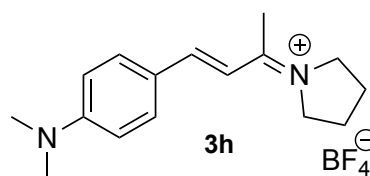

2H), 6.78 (m, 3H), 7.67 (d,  $J = 9.0$  Hz, 1H), 7.82 (d,  $J = 15.6$  Hz, 1H).  $^{13}\text{C}$  NMR (150 MHz,  $\text{CD}_3\text{CN}$ )  $\delta$  18.4, 25.0, 25.2, 40.3, 53.3, 54.3, 112.8, 112.9, 122.1, 133.4, 153.8, 154.9, 172.7. HRMS (EIS-QTOF) calcd for  $\text{C}_{16}\text{H}_{23}\text{N}_2$  [ $\text{M}^+$ ]: 243.1858, found 243.1858.

## References

1. The following paper does not contain data for **3a**. H. Guan, M. Iimura, M. P. Magee, J. R. Norton, G. Zhu, *J. Am. Chem. Soc.*, 2005, **127**, 7805-7814.
2. The following papers contain data for the  $\text{ClO}_4^-$  salt of **3a**. (a) N. J. Leonard and J. V. Paukstelis, *J. Org. Chem.*, 1963, **28**, 3021-3024. (b) M. Yamaguchi, T. Shiraishi and M. Hirama, *J. Org. Chem.*, 1996, **61**, 3520-3530.

### 3. General procedure for irradiation of iminium salts in the solid-state

The powdered crystals of eniminium salt were placed between two glass plates and were irradiated with a 250 W high-pressure mercury lamp for 3-6 h. The crude products **4** and **5** were collected, and the product ratio was determined by  $^1\text{H}$  NMR. As the products **4** and **5** were unstable in open atmosphere, it was hydrolyzed to diacetyl ketones as described below. To confirm the structure of dimer **5**,  $^1\text{H}$  NMR,  $^{13}\text{C}$  NMR and X-ray crystallographic analyses for dimer **5a** were achieved.

Dimer **5a**: Irradiation of iminium **3a** gave dimer **5a**, which was obtained as a white solid. Fortunately, recrystallization of crude **5a** from  $\text{CH}_3\text{CN}/\text{CH}_2\text{Cl}_2$  gave crystals suitable for X-ray crystallographic analysis (p.S49).

$^1\text{H}$  NMR (600MHz,  $\text{CD}_3\text{CN}$ )  $\delta$  1.76-1.83 (m, 4H), 1.93-2.31 (m, 4H), 2.31 (s, 6H), 3.41 (m, 2H), 3.72 (m, 4H), 3.89 (m, 2H), 4.49 (t,  $J = 9.6$  Hz, 2H), 4.92 (t,  $J = 9.6$  Hz, 2H), 7.40-7.48(m, 10H).  $^{13}\text{C}$  NMR (150 MHz,  $\text{CD}_3\text{CN}$ )  $\delta$  23.3, 24.1, 24.8, 44.0, 49.0, 55.7, 56.0, 127.8, 129.2, 130.0, 136.4, 186.

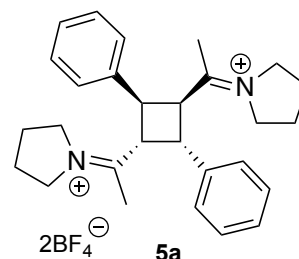

Crystal structure of **5a** (see, ESI, S49)

Monoclinic,  $P2_1$ ,  $V = 1345.71(8) \text{ \AA}^3$

$a = 7.1302(3) \text{ \AA}$ ,  $b = 14.6918(5) \text{ \AA}$ ,  $c = 13.1044(4) \text{ \AA}$

$\beta = 101.392(2)^\circ$

$R1 = 0.0448$ ,  $wR2 = 0.1348$ .

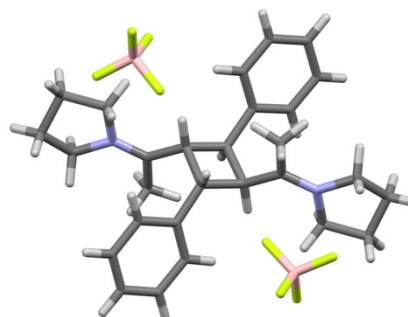

#### 4. Control experiments of irradiation of $\alpha,\beta$ -unsaturated ketones

As control experiments, direct photodimerization of conjugated ketones **1a**, **1f**, **1g** and **1h** was investigated. Of the compounds **1a-1h**, **1b-1e** could not be used in this study because **1b-1e** is liquid at rt.

Table S1 Solid-state irradiation of (*E*)-**1**

| (E)- <b>1</b> | Time(h) | Conv(%) | yield(%)                    |                              |                             |                              |               |
|---------------|---------|---------|-----------------------------|------------------------------|-----------------------------|------------------------------|---------------|
|               |         |         | <b>6-A</b> ( <i>synHT</i> ) | <b>6-B</b> ( <i>antiHT</i> ) | <b>6-C</b> ( <i>synHH</i> ) | <b>6-D</b> ( <i>antiHH</i> ) | (Z)- <b>1</b> |
| <b>1a</b>     | 3       | 84      | 36                          | 4                            | 13                          | 28                           | 19            |
| <b>1f</b>     | 18      | 79      | 6                           | 7                            | 53                          | 34                           | 0             |
| <b>1g</b>     | 3       | 99      | 15                          | 4                            | 53                          | 28                           | 0             |
| <b>1h</b>     | 3       | 0       | -                           | -                            | -                           | -                            | -             |

a) Determined by  $^1\text{H}$  NMR spectra.

## 5. Attempt on hydrolysis of photodimers to diacetylcyclobutanes

A survey of various hydrolysis conditions revealed that acetic acid and citric acid induced considerable isomerization of **6-A** (synHT) to **6-C** (rcct-dimer), while PPTS is effective in hydrolysis without isomerization.

Table S2 Hydrolysis of intermediate photodimers after irradiation of **3a** and **3b**

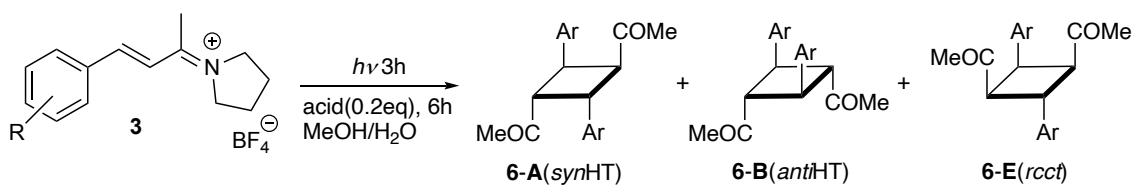

| Substrate         | Acid<br>(0.2 eq) | yield(%) <sup>a)</sup> |                     |                   |
|-------------------|------------------|------------------------|---------------------|-------------------|
|                   |                  | <b>6-A</b> (synHT)     | <b>6-B</b> (antiHT) | <b>6-E</b> (rcct) |
| <b>3a</b> (R = H) | acetic acid      | 68                     | 8                   | 24                |
| <b>3a</b> (R = H) | citric acid      | 55                     | 9                   | 36                |
| <b>3a</b> (R = H) | PPTS             | 88                     | 6                   | 5                 |
| <b>3b</b> (R = F) | PPTS             | 95                     | 0                   | 5                 |

a) Determined by <sup>1</sup>H NMR.

## 6. General procedure of hydrolysis of photodimers and spectral data for 6a-6h

### 6.1 Hydrolysis of dimers of iminium salt 2a

To a solution of 1.0 M HCl was added the photoproduct obtained from iminium salt **2a**. The mixture was stirred for 18h, and the crude product was extracted with dichloromethane. The organic layer was separated and dried over anhydrous magnesium sulfate. The solution was then filtered, and the solvent was removed under reduced pressure. The product ratio was determined by  $^1\text{H}$  NMR spectroscopy and separated by PTLC.

### 6.2 General procedure for hydrolysis of dimers of iminium salts 3

To a solution of pyridinium *p*-toluenesulfonate (PPTS) (0.2 eq) in a 1:3 mixture of  $\text{H}_2\text{O}$  and MeOH (0.5 mL/1.5 mL) was added the photoproduct obtained from iminium salt **3**. The mixture was stirred for 6-18 h and the crude product was extracted with dichloromethane. The organic layer was washed with brine and dried over anhydrous magnesium sulfate. The solution was filtered, and the solvent was removed under reduced pressure. The product ratio was determined by  $^1\text{H}$  NMR spectroscopy and separated by PTLC.

**6a-A(synHT)**: Colorless solid.  $^1\text{H}$  NMR (500MHz,  $\text{CDCl}_3$ )  $\delta$  1.63 (s, 6H), 3.90 (dd,  $J = 11.0, 7.3$  Hz, 2H), 4.61 (dd,  $J = 11.0, 7.3$  Hz, 2H), 7.23-7.35 (m, 10H).

The  $^1\text{H}$  NMR chemical shifts are consistent with those reported.<sup>1)</sup> For further structural confirmation, the X-ray crystal structure is shown in SI(p.S51).

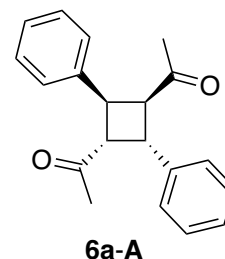

**6a-E(r-ctt)**: Colorless solid. mp 153~154.5 °C.  $^1\text{H}$  NMR (400MHz,  $\text{CDCl}_3$ )  $\delta$  1.69 (s, 6H), 3.71 (t,  $J = 10.0$  Hz, 2H), 4.38 (t,  $J = 10.0$  Hz, 1H), 4.81 (t,  $J = 10.0$  Hz, 1H), 7.18 (m, 10H). 1703, 1494, 1356, 1182, 169, 700  $\text{cm}^{-1}$ .

The  $^1\text{H}$  NMR chemical shifts and IR data are consistent with those reported.<sup>2)</sup>

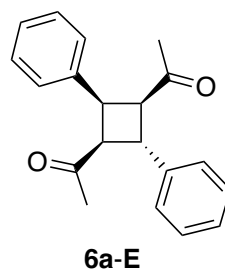

**6a-B(antiHT)**: Colorless crystalline solid. mp 100~102°C. IR (KBr) 2926, 1708, 1602, 1495, 1455, 1358, 1261, 1180, 1031, 800, 745, 696  $\text{cm}^{-1}$ .  $^1\text{H}$  NMR (500MHz,  $\text{CDCl}_3$ )  $\delta$  1.98 (s, 6H), 3.38 (t,  $J = 9.6$  Hz, 2H), 3.37 (t,  $J = 9.6$  Hz, 2H), 7.28-7.31 (m, 2H), 7.37-7.41 (m, 8H).  $^{13}\text{C}$  NMR (150 MHz,  $\text{CDCl}_3$ )  $\delta$  28.8, 42.2, 56.5, 127.3, 127.5, 129.1, 141.1, 206.7. HRMS (ESI-QTOF) calcd for  $\text{C}_{20}\text{H}_{20}\text{NaO}_2$   $[\text{M}+\text{Na}]^+$  315.1356, found 315.1358. The X-ray crystal structure was shown in ESI(p.S53).

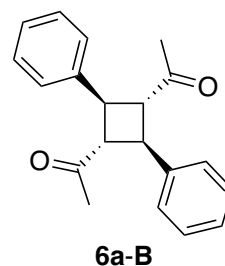

**6b-A(synHT)**: Colorless crystalline solid. mp 172~174 °C. IR (KBr) 1700, 1608, 1513, 1355, 1233, 1178, 834, 816, 559, 522 cm<sup>-1</sup>. <sup>1</sup>H NMR (400MHz, CDCl<sub>3</sub>) δ 1.66 (s, 6H), 3.85 (dd, *J* = 10.8, 7.1 Hz, 2H), 4.57 (dd, *J* = 10.8, 7.1 Hz, 2H), 6.99-7.05 (m, 4H), 7.24 (m, 4H). <sup>13</sup>C NMR (150 MHz, CDCl<sub>3</sub>) δ 29.9, 40.0, 54.9, 115.8 (*J* = 18 Hz), 129.6 (*J* = 9 Hz), 134.7 (*J* = 4.5 Hz), 162.2 (*J* = 245 Hz), 206.8. HRMS (ESI-QTOF) calcd for C<sub>20</sub>H<sub>18</sub>NaO<sub>2</sub> [M+Na]<sup>+</sup> 351.1167, found 351.1169.

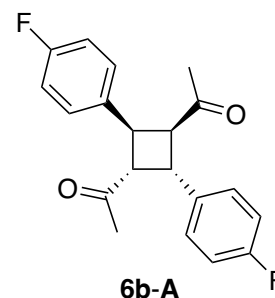

**6b-E(r-ccf)**: Colorless crystalline solid. mp 159~161 °C. IR (KBr) 1705, 1604, 1510, 1351, 1225, 1168, 847, 810, 680, 582, 551, 523 cm<sup>-1</sup>. <sup>1</sup>H NMR (400MHz, CDCl<sub>3</sub>) δ 1.69 (s, 3H), 3.66 (t, *J* = 10.3 Hz, 2H), 4.38 (t, *J* = 10.3 Hz, 1H), 4.75 (t, *J* = 10.3 Hz, 1H), 6.97-7.02 (m, 4H), 7.15-7.21 (m, 4H). <sup>13</sup>C NMR (150 MHz, CDCl<sub>3</sub>) δ 28.7, 38.8, 44.2, 54.4, 115.4 (*J* = 21 Hz), 116.2 (*J* = 21 Hz), 128.2 (*J* = 7.5 Hz), 130.1 (*J* = 7.5 Hz), 132.7 (*J* = 3 Hz), 138.1 (*J* = 3 Hz), 161.2 (*J* = 78 Hz), 162.8 (*J* = 8.1), 206.1. HRMS (ESI-QTOF) calcd for C<sub>20</sub>H<sub>18</sub>NaO<sub>2</sub> [M+Na]<sup>+</sup> 351.1167, found 351.1171.

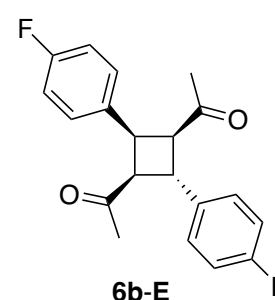

**6c-A(synHT)**: Colorless crystalline solid. mp 143~145 °C. IR (KBr) 3057, 2971, 1697, 1496, 1463, 1349, 1306, 1219, 1195, 1172, 769, 731, 569 cm<sup>-1</sup>. <sup>1</sup>H NMR (400MHz, CDCl<sub>3</sub>) δ 1.63 (s, 6H), 2.47 (s, 6H), 3.94 (dd, *J* = 11.0, 7.3 Hz, 2H), 4.83 (dd, *J* = 11.0, 7.3 Hz, 2H), 7.15-7.22 (m, 8H). <sup>13</sup>C NMR (150 MHz, CDCl<sub>3</sub>) δ 20.3, 29.3, 36.9, 53.3, 126.3, 126.7, 127.3, 130.6, 136.3, 137.1, 207.2. HRMS (ESI-QTOF) calcd for C<sub>22</sub>H<sub>24</sub>NaO<sub>2</sub> [M+Na]<sup>+</sup> 343.1669, found 343.1670.

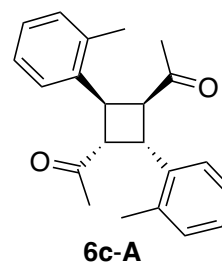

**6c-E(r-ccf)**: Colorless crystalline solid. mp 184~186 °C. IR (KBr) 1699, 1559, 1490, 1355, 1187, 766, 731, 541 cm<sup>-1</sup>. <sup>1</sup>H NMR (400MHz, CDCl<sub>3</sub>) δ 1.58 (s, 6H), 2.46 (s, 3H), 2.69 (s, 3H), 3.74 (t, *J* = 10.3 Hz, 2H), 4.82 (t, *J* = 10.3 Hz, 1H), 4.96 (t, *J* = 10.3 Hz, 1H), 7.08-7.24 (m, 7H), 7.35 (d, *J* = 7.8 Hz, 1H). <sup>13</sup>C NMR (150 MHz, CDCl<sub>3</sub>) δ 20.3, 20.8, 28.2, 35.7, 38.4, 55.8, 125.9, 126.2, 126.7, 127.0, 127.0, 127.5, 130.6, 130.9, 135.3, 135.8, 137.3, 140.9, 206.0. HRMS (ESI-QTOF) calcd for C<sub>22</sub>H<sub>24</sub>NaO<sub>2</sub> [M+Na]<sup>+</sup> 343.1669, found 343.1674.

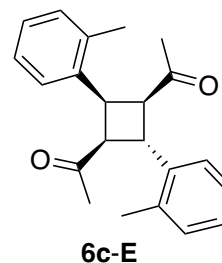

**6d-A(synHT)**: Colorless crystalline solid. mp 108~110°C. IR (KBr) 2930, 1699, 1607, 1349, 1182, 1127, 784, 702 cm<sup>-1</sup>. <sup>1</sup>H NMR (400MHz, CDCl<sub>3</sub>) δ 1.64 (s, 6H), 2.34 (s, 6H), 3.87 (dd, *J* = 11.2, 7.1 Hz, 2H), 4.56 (dd, *J* = 11.2, 7.1 Hz, 2H), 7.04-7.09 (m, 6H), 7.19-7.23 (m, 2H). <sup>13</sup>C NMR (150 MHz, CDCl<sub>3</sub>) δ 21.6, 29.9, 40.9, 54.7, 125.0, 128.2, 128.8, 128.8, 138.5, 139.1, 207.1. HRMS (ESI-QTOF) calcd for C<sub>22</sub>H<sub>24</sub>NaO<sub>2</sub> [M+Na]<sup>+</sup> 343.1669, found 343.1669.

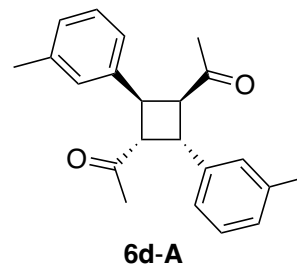

**6d-B(antiHT)**: Colorless oil. IR (neat) 2921, 1710, 1607, 1489, 1357, 1071, 774, 698 cm<sup>-1</sup>. <sup>1</sup>H NMR (400MHz, CDCl<sub>3</sub>) δ 1.98 (s, 6H), 2.38 (s, 6H), 3.36 (t, *J* = 9.6 Hz, 2H), 3.68 (t, *J* = 9.6 Hz, 2H), 7.10 (d, *J* = 7.3 Hz, 2H), 7.16-7.18 (m, 4H), 7.26-7.30 (m, 2H). <sup>13</sup>C NMR (150 MHz, CDCl<sub>3</sub>) δ 21.5 28.8 42.0 56.4 124.1 128.0 128.2 128.8 138.6 141.0 206.8. HRMS (ESI-QTOF) calcd for C<sub>22</sub>H<sub>24</sub>NaO<sub>2</sub> [M+Na]<sup>+</sup> 343.1669, found 343.1673.

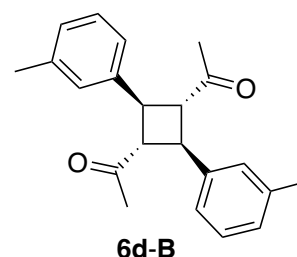

**6d-E(r-ctt)**: Colorless crystalline solid. mp 135~137 °C. IR (KBr) 1700, 1355, 1177, 782, 706 cm<sup>-1</sup>. <sup>1</sup>H NMR (400MHz, CDCl<sub>3</sub>) δ 1.67 (s, 6H), 2.31 (s, 3H), 2.33 (s, 3H), 3.68 (t, *J* = 10.3 Hz, 2H), 4.32 (t, *J* = 10.3 Hz, 1H), 4.76 (t, *J* = 10.3 Hz, 1H), 7.00-7.07 (m, 6H), 7.15-7.22 (m, 2H). <sup>13</sup>C NMR (150 MHz, CDCl<sub>3</sub>) δ 21.6, 28.6, 39.6, 45.0, 54.4, 123.6, 125.4, 127.4, 127.5, 128.5, 128.6, 129.0, 129.2, 137.2, 138.3, 138.7, 142.8, 206.9. HRMS (ESI-QTOF) calcd for C<sub>22</sub>H<sub>25</sub>O<sub>2</sub> [M+H]<sup>+</sup> 321.1849, found 321.1853.

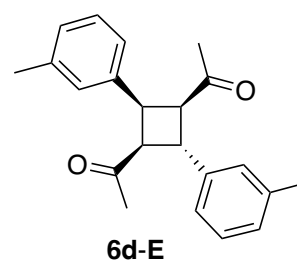

**6e-A(synHT)**: Colorless crystalline solid. mp 179~181°C. IR (KBr) 2922, 1699, 1515, 1353, 1316, 1254, 1222, 1175, 1118, 1025, 818, 729, 559 cm<sup>-1</sup>. <sup>1</sup>H NMR (400MHz, CDCl<sub>3</sub>) δ 1.64 (s, 6H), 2.31 (s, 6H), 3.85 (dd, *J* = 11.0, 7.3 Hz, 2H), 4.55 (dd, *J* = 11.0, 7.3 Hz, 2H), 7.11-7.18 (m, 8H). <sup>13</sup>C NMR (150 MHz, CDCl<sub>3</sub>) δ 21.2, 30.0, 40.6, 54.9, 127.9, 129.6, 136.1, 137.1, 207.3. HRMS (ESI-QTOF) calcd for C<sub>22</sub>H<sub>24</sub>NaO<sub>2</sub> [M+Na]<sup>+</sup> 343.1669, found 343.1672.

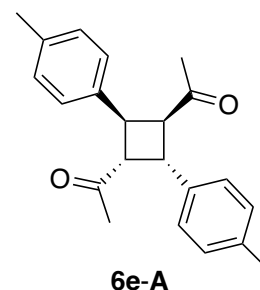

**6f-A(synHT)**: Colorless crystalline solid. mp 152~154 °C. IR (KBr) 3001, 2964, 1700, 1613, 1517, 1458, 1318, 1250, 1179, 1038, 844, 814, 562  $\text{cm}^{-1}$ .  $^1\text{H}$  NMR (400MHz,  $\text{CDCl}_3$ )  $\delta$  1.64 (s, 6H), 3.79-3.85 (m, 8H), 4.53 (dd,  $J = 11.0, 7.3$  Hz, 2H), 6.84-6.87 (m, 4H), 7.18-7.21 (m, 4H).  $^{13}\text{C}$  NMR (150 MHz,  $\text{CDCl}_3$ )  $\delta$  30.0, 40.1, 55.2, 55.4, 114.2, 129.1, 131.2 158.8, 207.4. HRMS (ESI-QTOF) calcd for  $\text{C}_{22}\text{H}_{24}\text{NaO}_4$   $[\text{M}+\text{Na}]^+$  375.1567, found 375.1576.

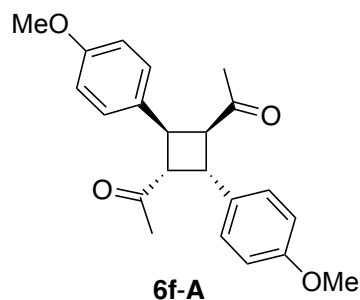

**6g-A(synHT)**: Colorless crystalline solid. mp 168~170 °C. IR (KBr) 3002, 1697, 1587, 1507, 1457, 1429, 1330, 1248, 1122, 999, 834  $\text{cm}^{-1}$ .  $^1\text{H}$  NMR (400MHz,  $\text{CDCl}_3$ )  $\delta$  1.70 (s, 6H), 3.78-3.82 (m, 8H), 3.89 (s, 12H), 4.54 (dd,  $J = 11.2, 7.1$  Hz, 2H), 6.48 (s, 4H).  $^{13}\text{C}$  NMR (150 MHz,  $\text{CDCl}_3$ )  $\delta$  29.9, 41.3, 55.4, 56.3, 61.1, 104.9, 135.0, 137.2, 153.4, 207.3. HRMS (ESI-QTOF) calcd for  $\text{C}_{26}\text{H}_{32}\text{NaO}_8$   $[\text{M}+\text{Na}]^+$  495.1989, found 495.1992.

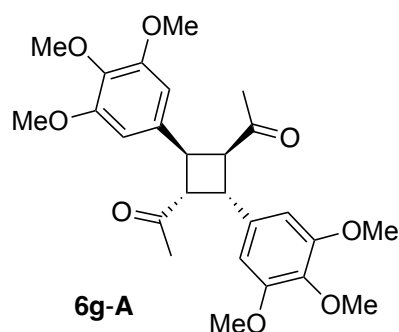

## References

1. G. Montaudo and S. Caccamese, *J. Org. Chem.*, 1973, **38**, 710-716.
2. J. Dekker and T. G. Dekker, *J. Org. Chem.*, 1968, **33**, 2604-2605.



## 7. Details of computational methods

All calculations on geometries and energies were performed with the Mac SPARTAN<sup>1-3</sup> Pro 20' program package. The geometries for compounds **3a**, **3h**, **5b** and **6b** were fully optimized by DFT calculations at the B3LYP/6-31G(d) level.

### 7.1 Comparison of the electrostatic charge between **3a** and **3h**

The electrostatic potential maps for **3a** and **3h** were obtained for their optimized geometries.

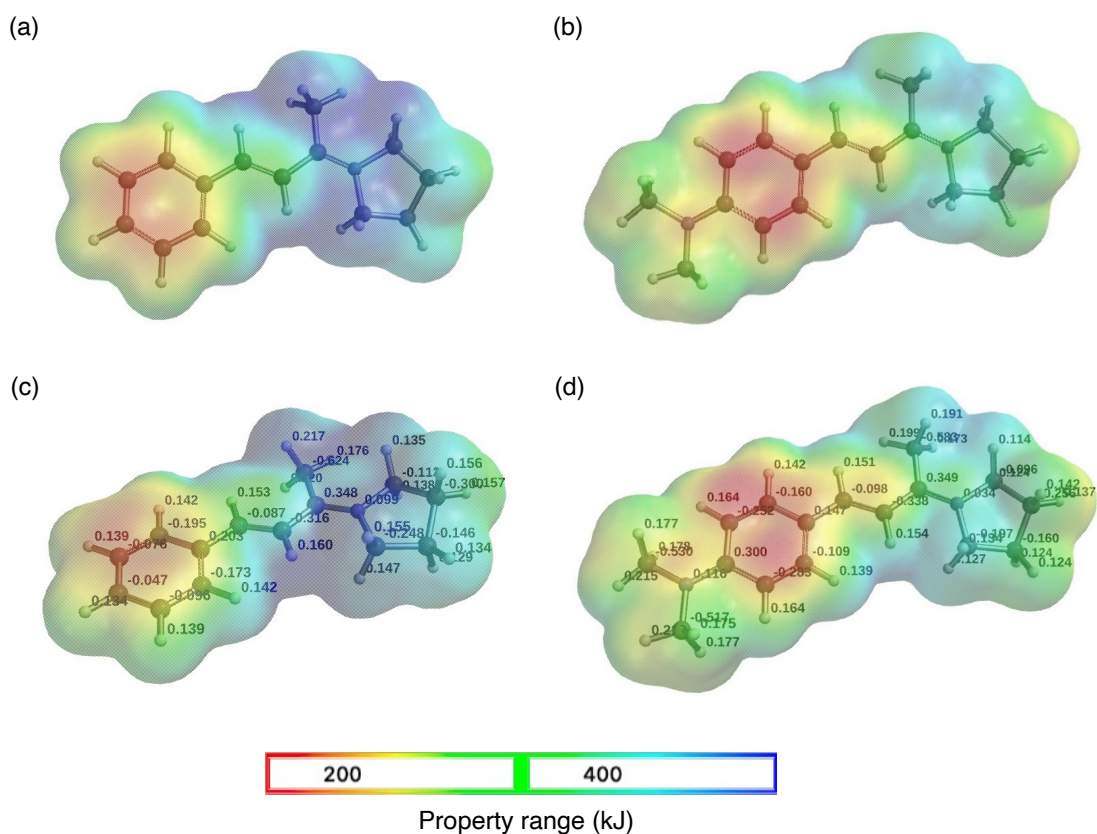

Fig. S1 The electrostatic potential maps for **3a** (a) and **3h** (b), and electrostatic charge for **3a** (c) and **3h** (d).

## 7.2 Comparison of energies of stable conformers of compound **5b**.

Structure optimization of **5b** gave two conformers **A** and **B**, which were shown in Fig S2. The conformer **A** is much more stable than conformer **B**. The reduction with DIBAL-H seems to occur from conformer **A** as shown in Fig S2

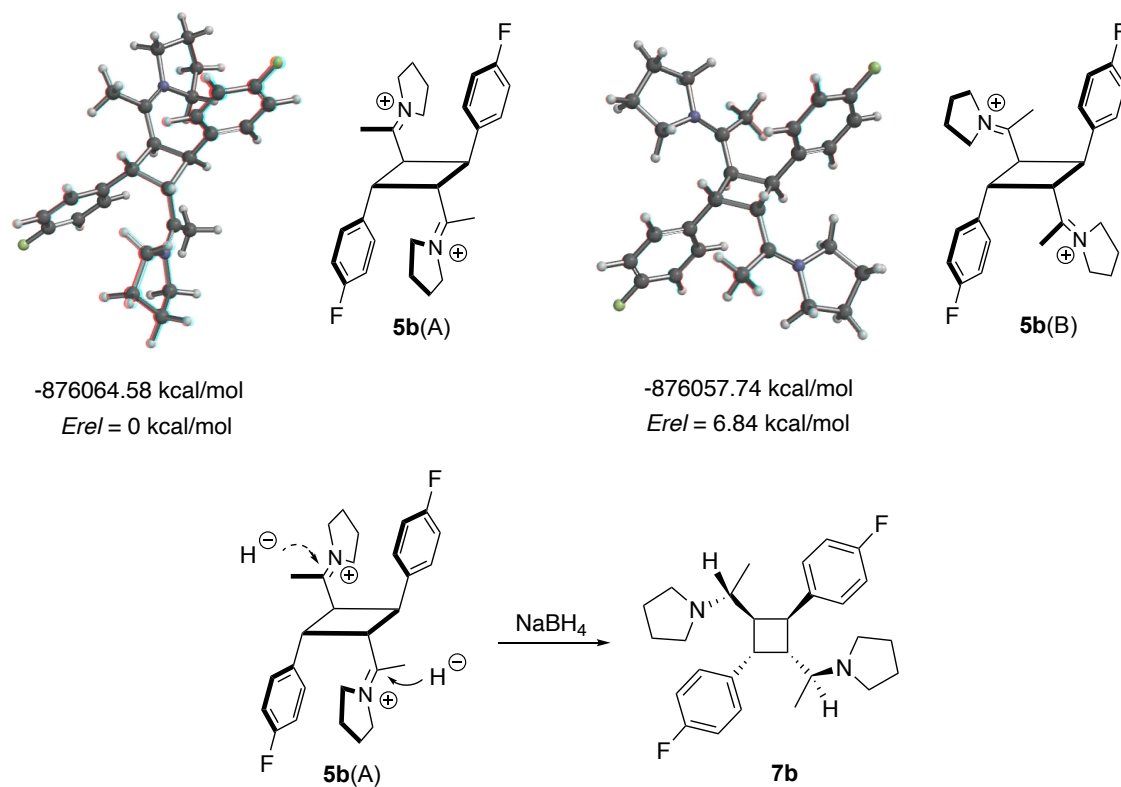

Fig. S2 Two optimized conformers **5b(A)** and **5b(B)**, and plausible reduction pathway

## 7.3 Structure optimization of **6b**

The structure optimization of **6b** gave only one conformer, which is shown in Fig S3. This was close to that of crystal structure.

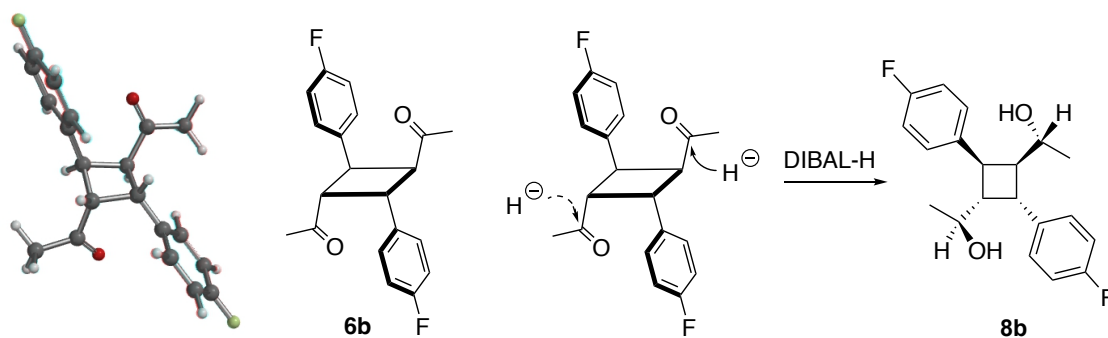

Fig. S3 Optimized geometry of **6b**, and plausible reduction pathway

## 8. Synthesis of dimer derivatives

### 8.1 Synthesis of 7b

The powdered crystal of iminium salt **3b** (99.8 mg, 0.33mmol) was spread thinly in a circular shape about 10 cm in diameter and sandwiched between two glass plates, which was irradiated with a 365 nm 18W LED lamp for 3h. The reaction mixture was dissolved in dry MeOH (4 mL), and NaBH<sub>4</sub> (6.2 mg) was added to the solution. After stirring for overnight at rt, saturated NH<sub>4</sub>Cl solution was added and the reaction mixture was extracted with dichloromethane. The

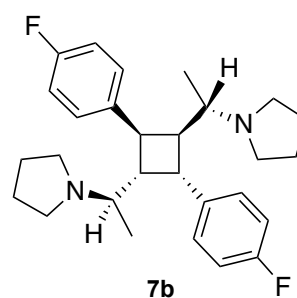

organic layer was washed with brine, and dried over anhydrous magnesium sulfate. The solution was filtered, and the solvent was removed under reduced pressure to give crude **7b**. This was recrystallized from CH<sub>2</sub>Cl<sub>2</sub>/ether to give white crystals (57.3 mg, 80% from **3b**). Colorless crystal. mp 170~172 °C. IR (KBr) 2962, 2805, 1602, 1507, 1458, 1369, 1219, 1162, 1139, 855, 817 cm<sup>-1</sup>. <sup>1</sup>H NMR (600MHz, CDCl<sub>3</sub>) δ 0.35 (d, *J* = 6.6 Hz, 6H), 1.33-1.40 (m, 4H), 1.43-1.47 (m, 4H), 2.14-2.17 (m, 4H), 2.24-2.17 (m, 4H), 2.63-2.68 (m, 2H), 2.72-2.77 (m, 2H), 3.78 (dd, *J* = 10.2, 7.2 Hz, 2H), 7.00 (t, *J* = 9.0 Hz, 4H), 7.26-7.32 (m, 4H). <sup>13</sup>C NMR (150 MHz, CDCl<sub>3</sub>) δ 10.3, 23.5, 43.0, 47.7, 48.6, 54.9, 114.9 (*J* = 21 Hz), 130.2 (*J* = 7.5 Hz), 138.7, 161.3 (*J* = 243 Hz). HRMS (ESI-QTOF) calcd for C<sub>28</sub>H<sub>37</sub>N<sub>2</sub>F<sub>2</sub> [M+H]<sup>+</sup> 439.2919, found 439.2930.

### 8.2 Synthesis of 8b from 3b

The powdered crystal of iminium salt **3b** (57.2 mg, 0.18 mmol) was spread thinly in a circular shape about 10 cm in diameter and sandwiched between two glass plates, which was irradiated with a 365 nm 18W LED lamp for 3h. The photoproduct was hydrolyzed to diketone **6b** with PPTS as described above. To a solution of the diketone **6b** in dry CH<sub>2</sub>Cl<sub>2</sub> (2mL) was added 1.0M DIBAL-H in hexane (0.3 ml) at -30°C. After stirring for 2h, saturated NH<sub>4</sub>Cl solution was added and the reaction mixture was

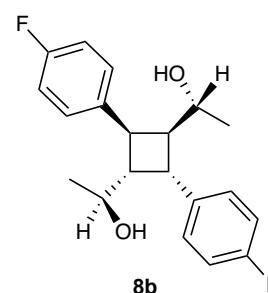

extracted with dichloromethane. The organic layer was washed with brine, and dried over anhydrous magnesium sulfate. The solution was filtered, and the solvent was removed under reduced pressure to give white solid (17 mg, 59% from **3b**). Colorless crystal. mp 177~179 °C. IR (KBr) 3545, 3446, 2975, 2923, 1603, 1507, 1374, 1225, 1158, 1127, 1071, 986, 909, 886, 842, 751, 623, 542 cm<sup>-1</sup>. <sup>1</sup>H NMR (400MHz, CDCl<sub>3</sub>) δ 0.91 (d, *J* = 6.4 Hz, 6H), 1.02 (br s, 2H), 2.82 (dd, *J* = 16.9, 9.6 Hz, 2H), 3.42 (dd, *J* = 9.6, 7.6 Hz, 2H), 3.77 (t, *J* = 7.6 Hz, 2H), 7.08-7.13 (m, 4H), 7.38-7.42 (m, 4H). <sup>13</sup>C NMR

(150 MHz, CDCl<sub>3</sub>)  $\delta$  20.0, 41.7, 49.1, 68.2, 116.1 ( $J = 21$  Hz), 129.9 ( $J = 7.5$  Hz), 135.8 ( $J = 3$  Hz), 162.0 ( $J = 245$  Hz). HRMS (ESI-QTOF) calcd for C<sub>20</sub>H<sub>22</sub>F<sub>2</sub>NaO<sub>2</sub> [M+Na]<sup>+</sup> 355.1480, found 355.1484.

### 8.3 Synthesis of **9b** from **3b**

The powdered crystal of iminium salt **3b** (70 mg, 0.23 mmol) was spread thinly in a circular shape about 10 cm in diameter and sandwiched between two glass plates, which was irradiated with a 365 nm 18W LED lamp for 3h. The photoproduct was hydrolyzed to diketone **6b** with PPTS as described above. To a solution of the crude diketone **6b** (36.5 mg) in dry THF (2mL) was added 1.0 M allyl magnesium chloride in THF (0.4 ml) at 0°C. After stirring for 48h at rt, saturated NH<sub>4</sub>Cl solution was added and the reaction mixture was extracted with dichloromethane. The organic layer was washed with brine, and dried over anhydrous magnesium sulfate. The solution was filtered, and the solvent was removed under reduced pressure to give crude product. This was subjected to PTLC in a 3:1 mixture of Hexane/EtOAc to give an 89:11 diastereomeric mixture of **9b** as white solid (37.6 mg, 79.3% yield). IR (KBr) 3580, 3456, 1639, 1603, 1508, 1223, 1159, 1096, 916, 815, 529 cm<sup>-1</sup>. <sup>1</sup>H NMR (500MHz, CDCl<sub>3</sub>)  $\delta$  0.84 (s, 6H), 1.16 (br s, 2H), 1.26 (t,  $J = 7.5$  Hz, 2H), 1.81 (dd,  $J = 7.0, 14.0$  Hz, 2H), 1.91 (dd,  $J = 7.0, 14.0$  Hz, 2H), 3.02-3.07 (m, 2H), 4.10-4.14 (m, 2H), 4.78 (dd,  $J = 2.0, 17.0$  Hz, 2H), 4.95 (dd,  $J = 2.0, 10.0$  Hz), 5.54-5.61 (m, 2H), 7.01-7.06 (m, 4H), 7.45-7.51 (m, 4H). <sup>13</sup>C NMR (150 MHz, CDCl<sub>3</sub>)  $\delta$  25.1, 41.1, 45.6, 50.7, 74.6, 115.3 ( $J = 21$  Hz), 118.8 ( $J = 4.5$  Hz), 131.3 ( $J = 7.5$  Hz), 133.5, 137.6, 161.6 ( $J = 243$  Hz). HRMS (ESI-QTOF) calcd for C<sub>26</sub>H<sub>29</sub>F<sub>2</sub>O<sub>2</sub> [M-1]<sup>+</sup> 411.2142, found 411.2141.

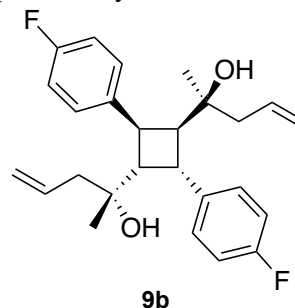

## 9. <sup>1</sup>H NMR spectra for 2a, 3a-3h, 5b and 6a-6h

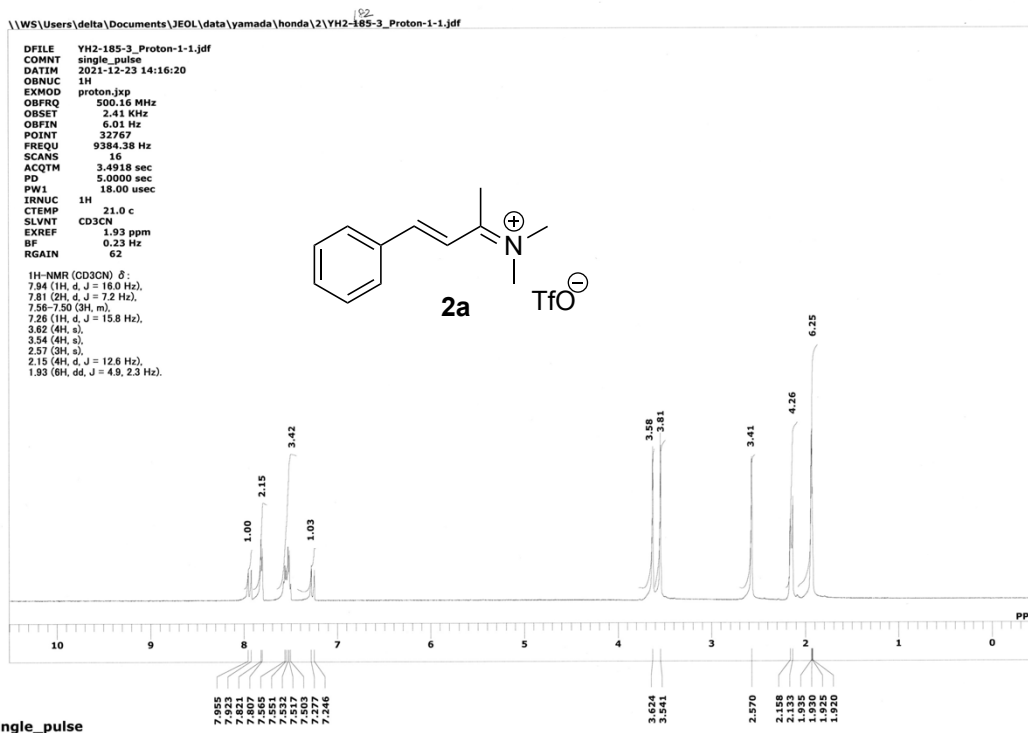

YH3-46-2-600-CD3CN

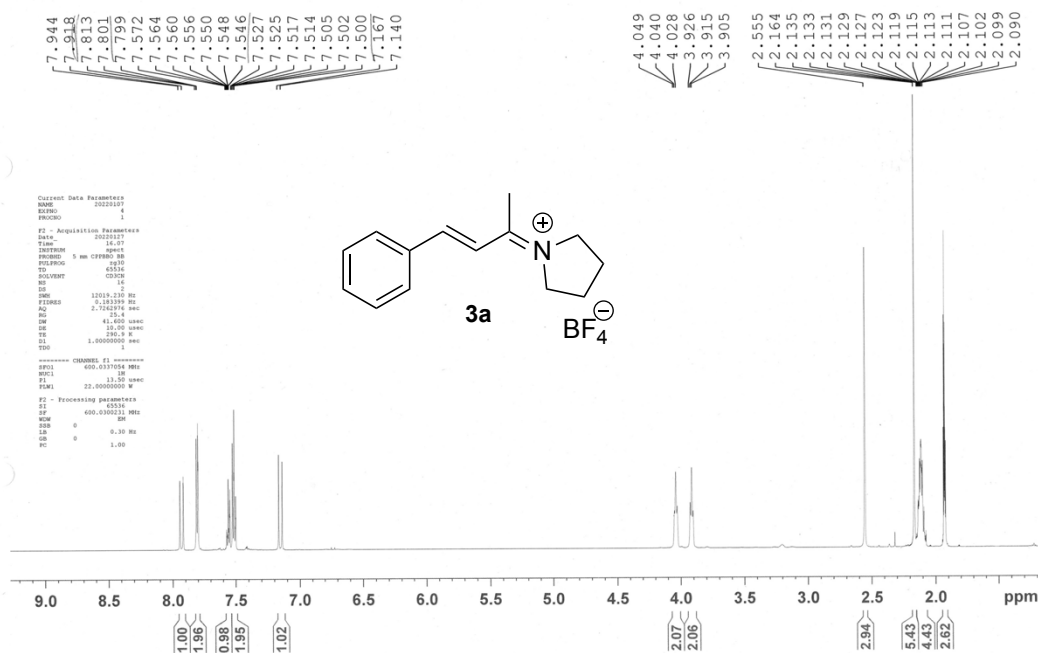

YH3-134-3

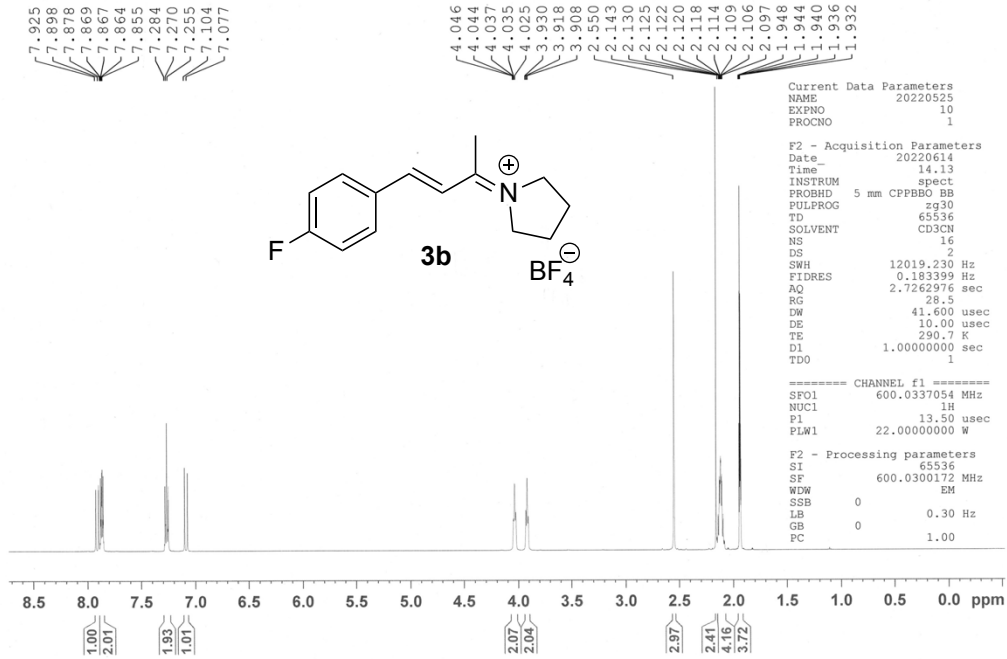

YH3-163-2-600

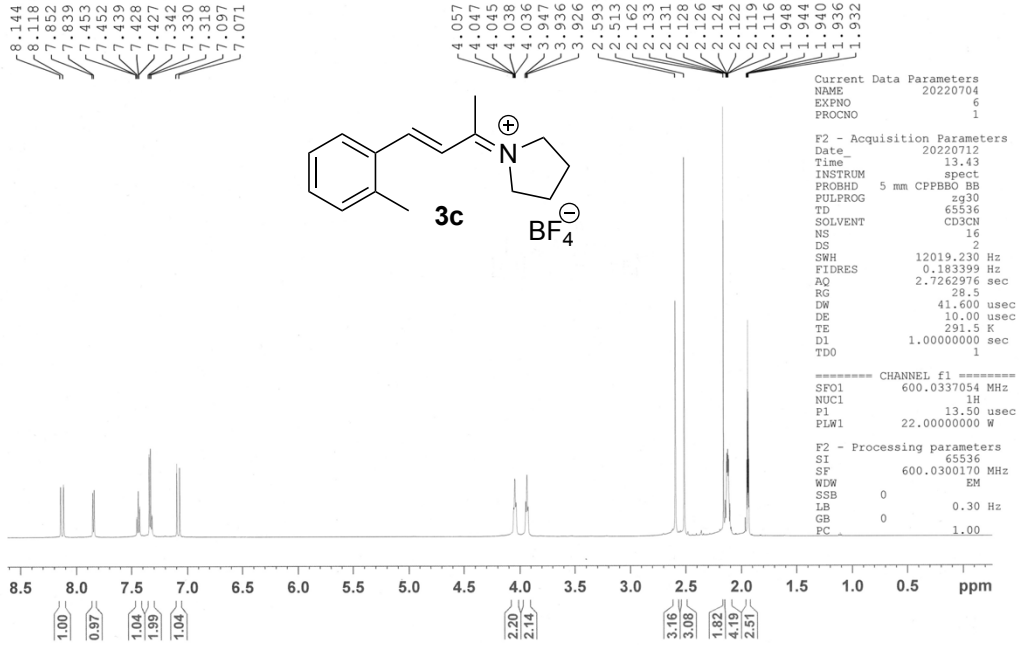

YH4-44-1

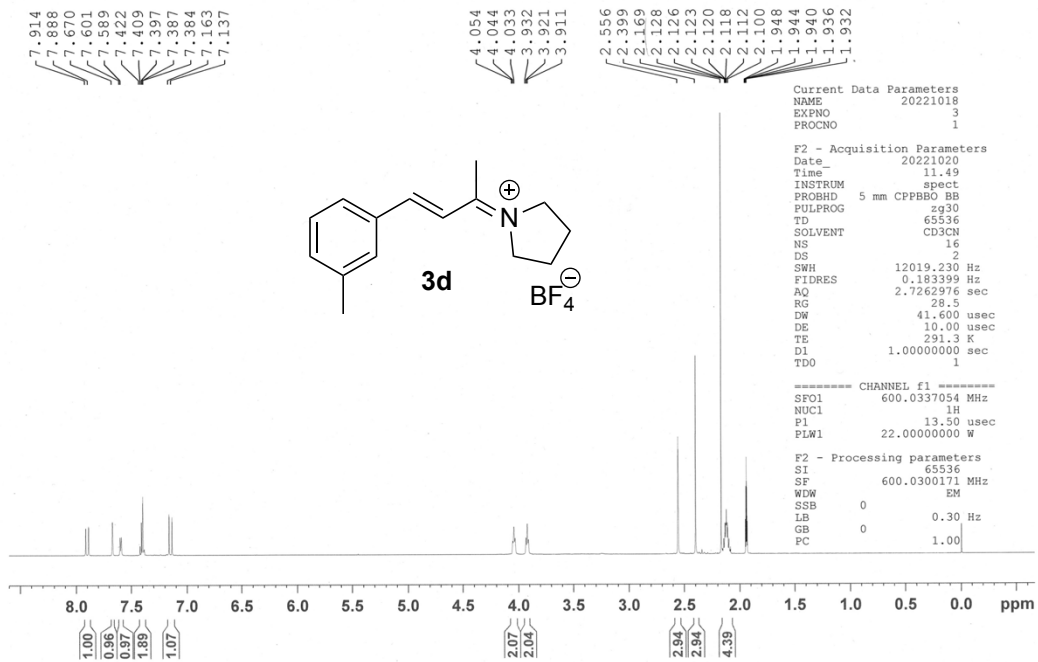

YH3-133-2

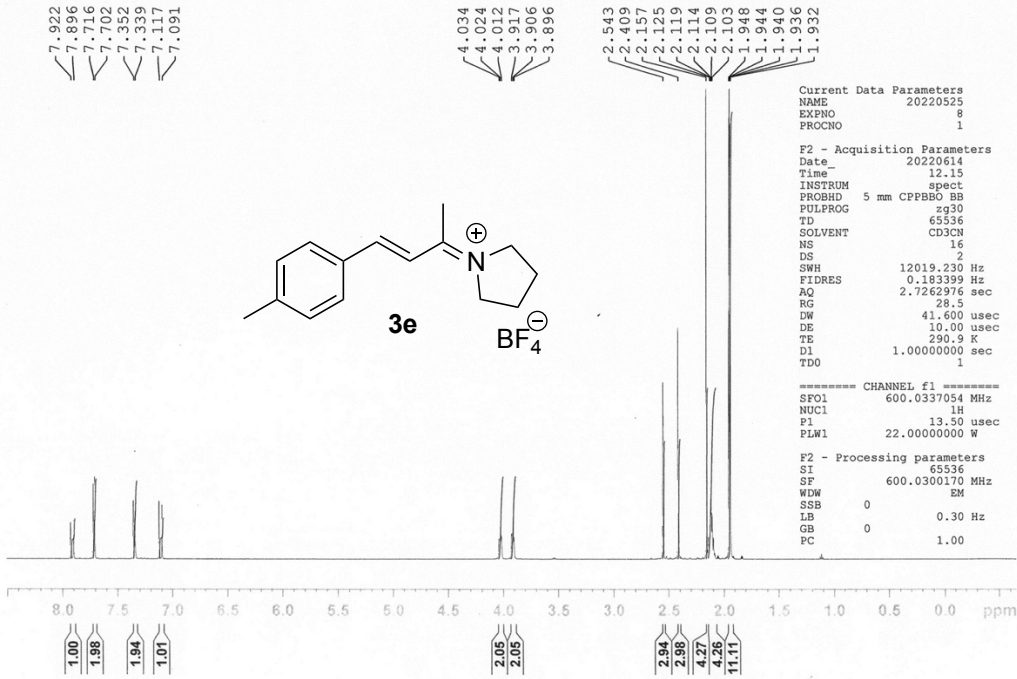





YH3-152-3-600

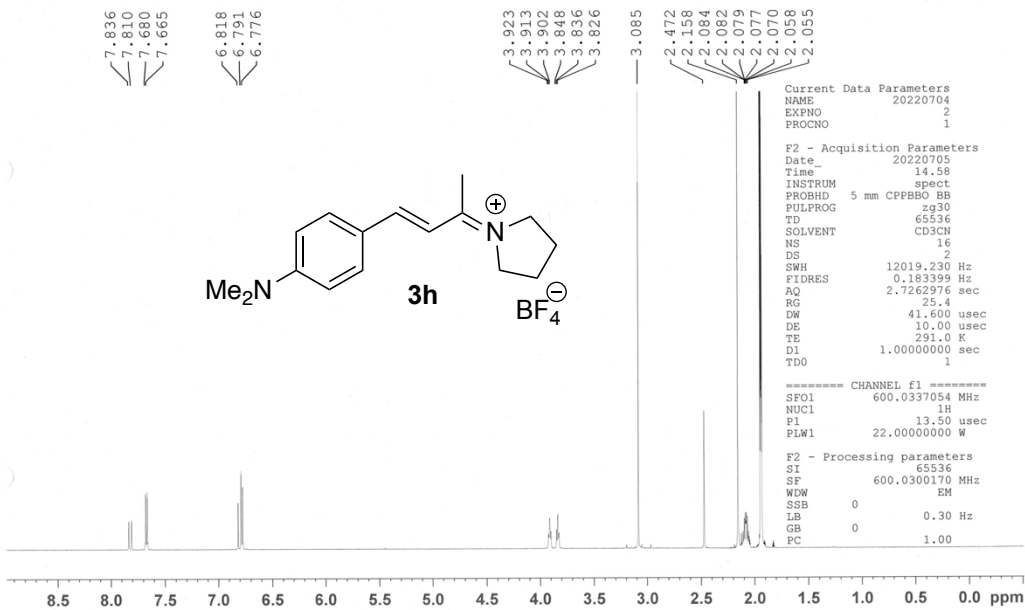

YH3-55-1-600-CD3CN

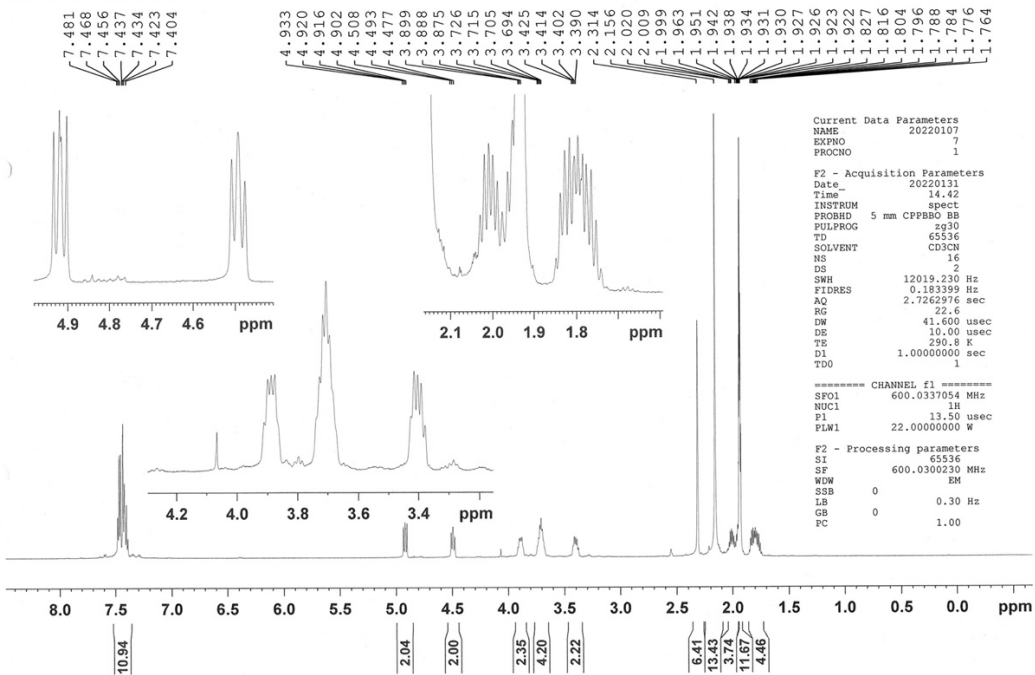

\\WS\Users\delta\Documents\JEOL\data\yamada\honda\2\YH2-190-1\_Proton-1-1.als

DFILE YH2-190-1\_Proton-1-1.als  
CONTR single\_pulse  
DATIM 2021-11-26 15:32:07  
OBNUC 1H  
EXMOD proton\_jxp  
OBFRQ 500.16 MHz  
OBSET 2.41 KHz  
OBSIN 6.01 Hz  
POINT 26214  
FREQU 7507.51 Hz  
SCANS 16  
ACQTM 3.4918 sec  
PD 5.0000 sec  
PW1 18.00 usec  
IRNUC 1H  
CTEMP 22.1 c  
SLVNT CDCl3  
EXREF 0.00 ppm  
BF 0.14 Hz  
RGAIN 60

1H-NMR (CDCl<sub>3</sub>) δ:  
7.35-7.23 (9H, m),  
4.61 (1H, dd, J = 11.0, 7.3 Hz),  
3.90 (1H, dd, J = 10.9, 7.4 Hz),  
1.63 (3H, s),  
1.25 (1H, t, J = 30.4 Hz),  
1.25 (3H, s),  
0.03 (1H, dd, J = 20.6, 17.5 Hz).

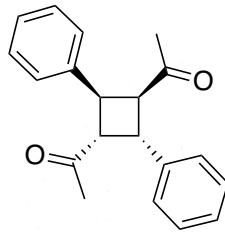

6a-A

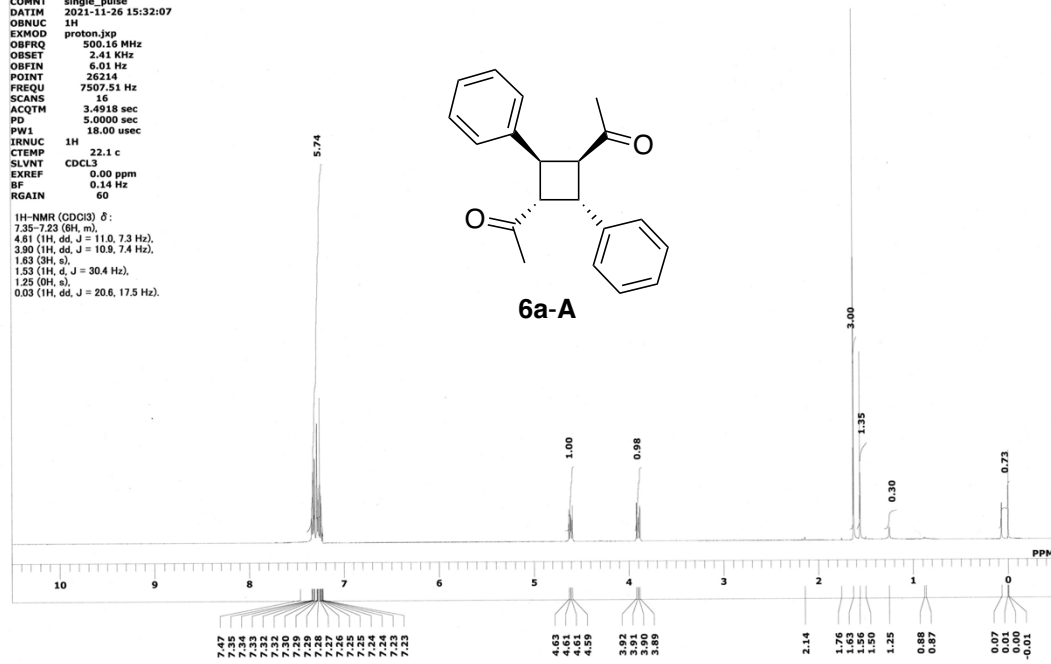

\\WS\Users\delta\Documents\JEOL\data\yamada\honda\2\YH2-190-3\_Proton-1-1.als

DFILE YH2-190-3\_Proton-1-1.als  
CONTR single\_pulse  
DATIM 2021-11-26 16:46:60  
OBNUC 1H  
EXMOD proton\_jxp  
OBFRQ 500.16 MHz  
OBSET 2.41 KHz  
OBSIN 6.01 Hz  
POINT 26214  
FREQU 7507.51 Hz  
SCANS 16  
ACQTM 3.4918 sec  
PD 5.0000 sec  
PW1 18.00 usec  
IRNUC 1H  
CTEMP 22.2 c  
SLVNT CDCl3  
EXREF 0.00 ppm  
BF 0.14 Hz  
RGAIN 62

1H-NMR (CDCl<sub>3</sub>) δ:  
7.39 (4H, dt, J = 10.0, 4.2 Hz),  
7.31-7.28 (1H, m),  
7.26 (1H, s),  
3.73 (1H, t, J = 9.6 Hz),  
3.38 (1H, t, J = 9.7 Hz),  
2.39 (3H, s),  
1.56 (3H, s),  
1.25 (1H, s),  
0.04 (3H, dd, J = 38.2, 3.3 Hz).

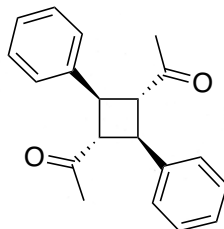

6a-B

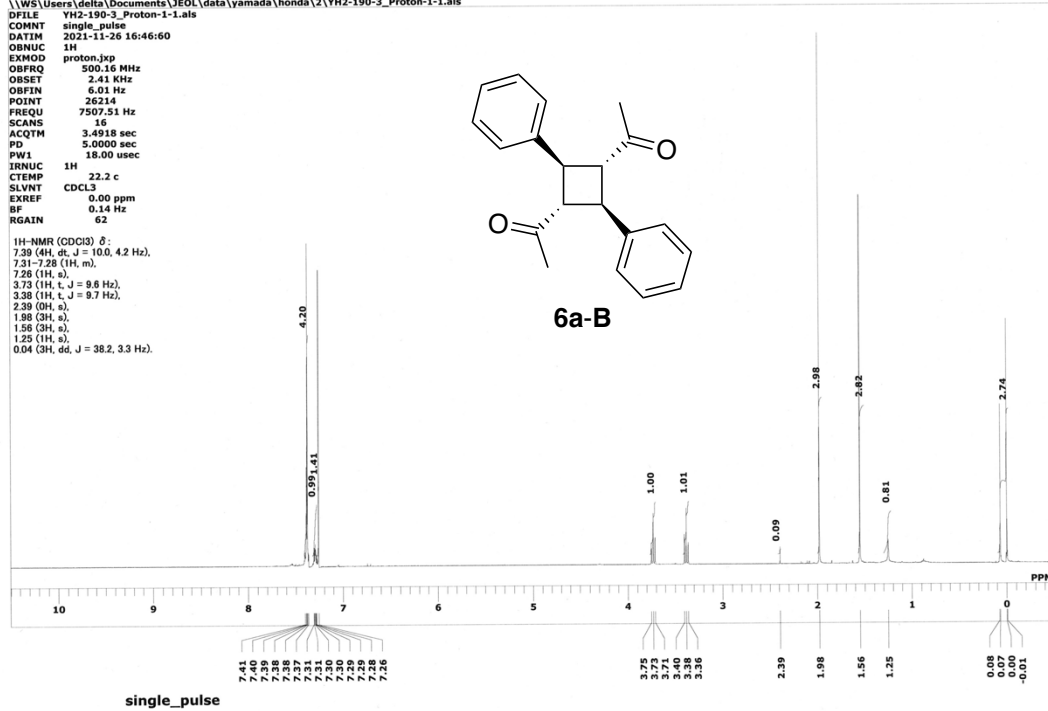

YWSHECS400data\yamada\Honda\YH4-58-2\_Proton-1-1.jdf

DFILE YH4-58-2\_Proton-1-1.jdf  
 COMNT single\_pulse  
 DATIM 2022-11-09 16:55:39  
 ORNUC 1H  
 EXMOD proton\_jcp  
 OBFRQ 399.78 MHz  
 ORSET 4.19 kHz  
 OBFIN 7.29 Hz  
 POINT 16384  
 FREQU 7503.00 Hz  
 SCANS 8  
 ACQTM 2.1837 sec  
 PD 5.0000 sec  
 PW1 5.43 usec  
 IRNUC 1H  
 CTMP 20.2 c  
 SLVNT CDCl3  
 EXREF 0.00 ppm  
 RF 0.23 Hz  
 RGAIN 54

1H-NMR (CDCl3)  $\delta$ :  
 7.333-7.179 (4H, m),  
 4.832 (2H, t, J = 10.53 Hz),  
 4.378 (2H, t, J = 10.07 Hz),  
 3.707 (2H, t, J = 10.30 Hz),  
 1.668 (6H, s),  
 1.538 (2H, d, J = 12.36 Hz),  
 0.000 (6H, t, J = 3.21 Hz).

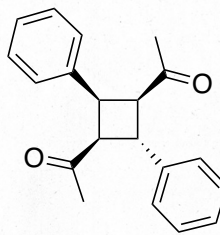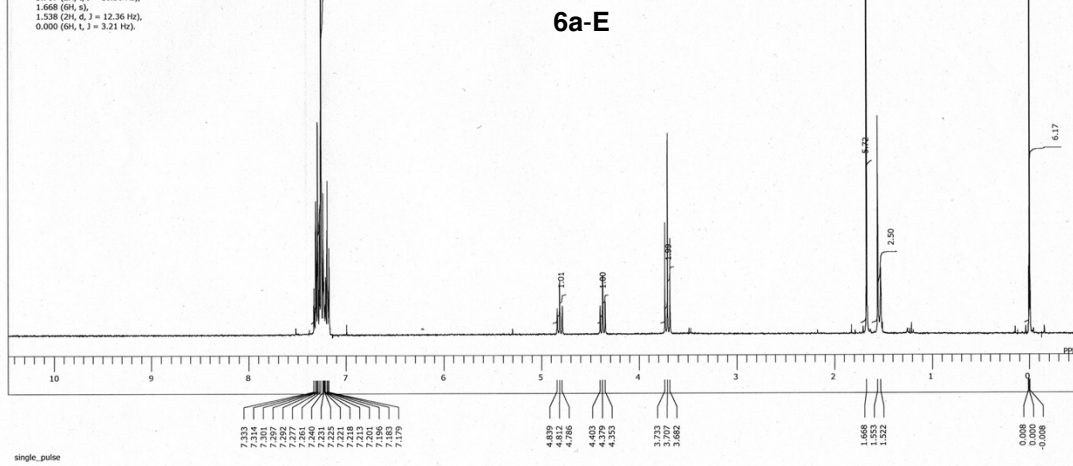

YWSHECS400data\yamada\Honda\YH4-55-1\_Proton-1-1.jdf

DFILE YH4-55-1\_Proton-1-1.jdf  
 COMNT single\_pulse  
 DATIM 2022-10-25 16:49:03  
 ORNUC 1H  
 EXMOD proton\_jcp  
 OBFRQ 399.78 MHz  
 ORSET 4.19 kHz  
 OBFIN 7.29 Hz  
 POINT 16384  
 FREQU 7503.00 Hz  
 SCANS 8  
 ACQTM 2.1837 sec  
 PD 5.0000 sec  
 PW1 5.43 usec  
 IRNUC 1H  
 CTMP 19.3 c  
 SLVNT CDCl3  
 EXREF 0.00 ppm  
 RF 0.23 Hz  
 RGAIN 50

1H-NMR (CDCl3)  $\delta$ :  
 7.301 (2H, s),  
 7.242 (6H, d, J = 9.46, 3.43 Hz),  
 7.053-6.994 (4H, m),  
 5.504 (2H, s),  
 4.573 (2H, dd, J = 10.99, 7.33 Hz),  
 3.845 (2H, dd, J = 10.76, 7.10 Hz),  
 1.658 (6H, s),  
 1.575 (4H, s),  
 1.254 (1H, s),  
 0.881 (2H, s),  
 0.031 (2H, dd, J = 17.17, 13.97 Hz).

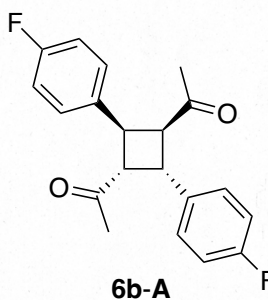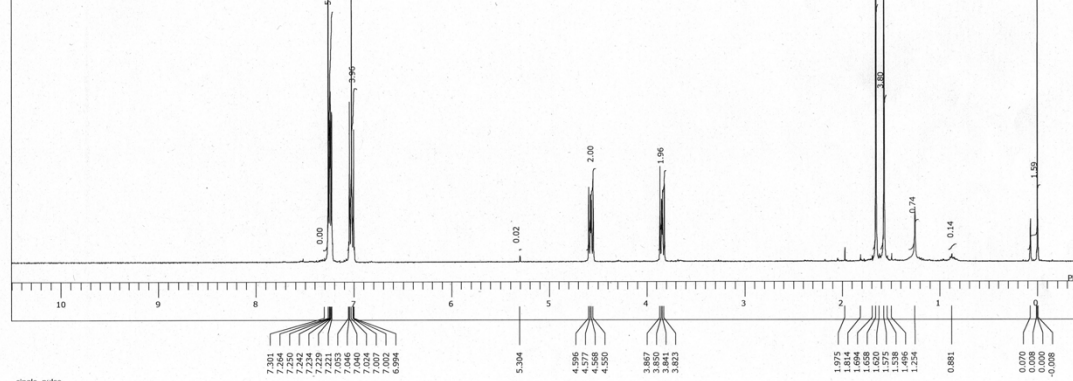

Y:\WS\EC5400\data\yamada\honda\YH4-56-1-2-2\_Proton-1-1.jdf

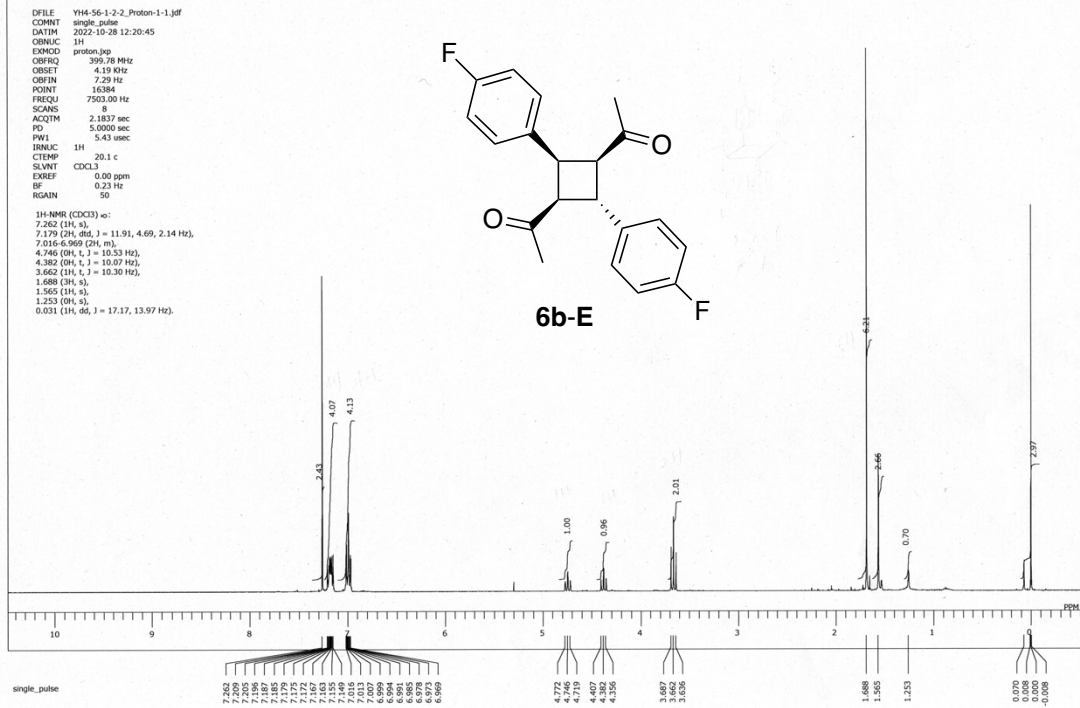

Y:\WS\EC5400\data\yamada\honda\YH4-54-1-1-2\_Proton-1-1.als

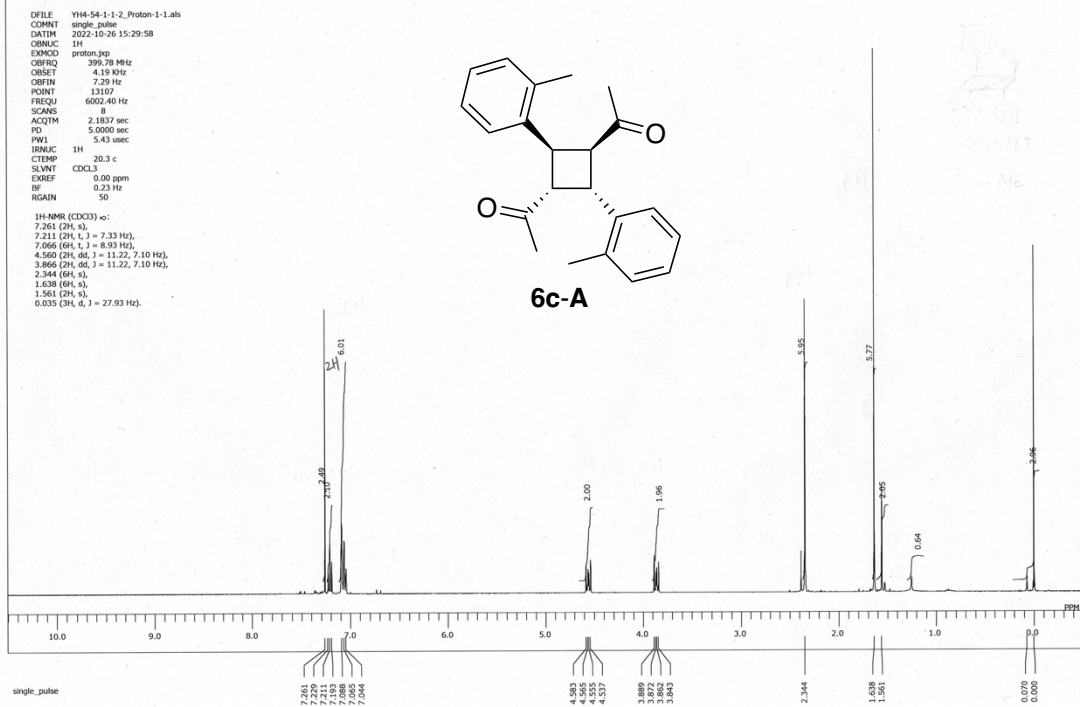

\\VVSFC5400\data\yamada\honda\YH4-54-1-2\_Proton-1-1.xls

DFILE YH4-54-1-2\_Proton-1-1.xls  
COMNT single\_pulse  
DATIM 2022-10-26 12:51:14  
ORNUC 1H  
EXMDO proton.jpg  
ORFRQ 399.78 MHz  
ORSET 4.19 KHz  
ORFIN 7.29 Hz  
POINT 13107  
FREQU 6002.40 Hz  
SCANS 8  
AQTM 2.1837 sec  
PD 5.0000 sec  
PWI 5.43 usec  
IRNUC 1H  
CTEMP 20.0 c  
SLVNT CDCl3  
EXREF 0.00 ppm  
BF 0.23 Hz  
RGAIN 50

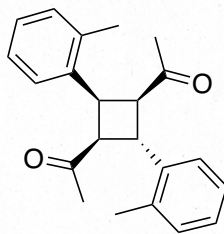

6c-E

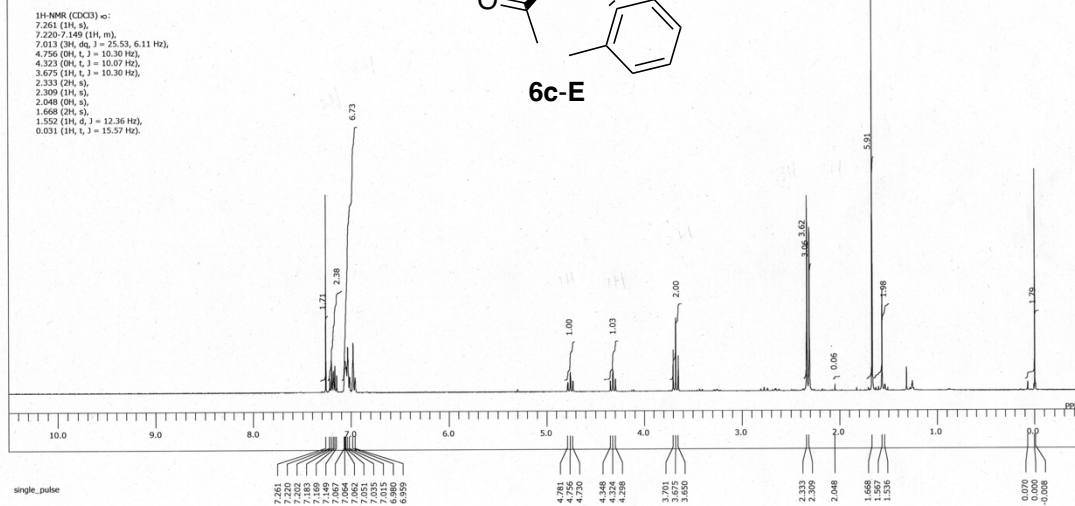

\\VVSFC5400\data\yamada\honda\YH4-61-2-1-2\_Proton-1-1.pdf

DFILE YH4-61-2-1-2\_Proton-1-1.pdf  
COMNT single\_pulse  
DATIM 2022-11-11 15:07:33  
ORNUC 1H  
EXMDO proton.jpg  
ORFRQ 399.78 MHz  
ORSET 4.19 KHz  
ORFIN 7.29 Hz  
POINT 10384  
FREQU 7503.00 Hz  
SCANS 8  
AQTM 2.1837 sec  
PD 5.0000 sec  
PWI 5.43 usec  
IRNUC 1H  
CTEMP 19.9 c  
SLVNT CDCl3  
EXREF 0.00 ppm  
BF 0.23 Hz  
RGAIN 54

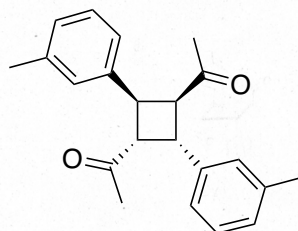

6d-A

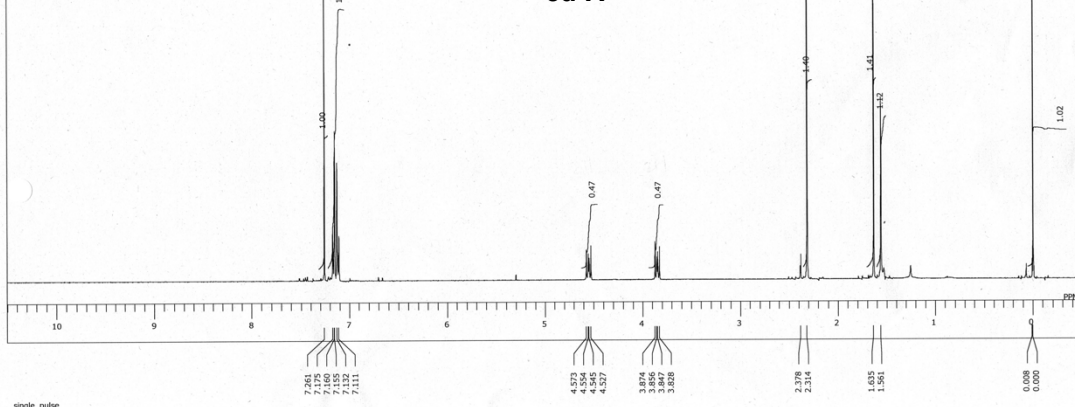

YVWSVECS400data\yamada\honda\YH4-54-1-4-2\_Proton-1-1.pdf

DFILE YH4-54-1-4-2\_Proton-1-1.pdf  
CONNT single\_pulse  
DATIM 2022-10-28 10:41:45  
ORNUC 1H  
EXMCO proton\_300  
OBFRO 399.78 MHz  
OBSET 4.19 kHz  
OBFIN 7.29 Hz  
POINT 1.6384  
FREQI 7003.00 Hz  
SCANS 8  
ACQTM 2.1837 sec  
PD 5.0000 sec  
PWI 5.43 usec  
IRNUC 1H  
CTEMP 19.5 c  
SLMNT CDCL3  
EXREF 0.00 ppm  
BF 0.23 Hz  
RGAIN 50

<sup>1</sup>H-NMR (CDCl<sub>3</sub>)  $\delta$ :  
7.285 (OH, d, J = 6.24 Hz),  
7.262 (3H, s),  
7.172 (1H, d, J = 7.79 Hz),  
7.105 (1H, d, J = 7.33 Hz),  
3.675 (1H, t, J = 9.62 Hz),  
3.361 (OH, t, J = 9.62 Hz),  
2.378 (1H, s),  
1.982 (1H, s),  
1.568 (4H, t, J = 13.28 Hz),  
1.254 (1H, s),  
0.881 (OH, s),  
0.031 (3H, dd, J = 17.17, 13.97 Hz).

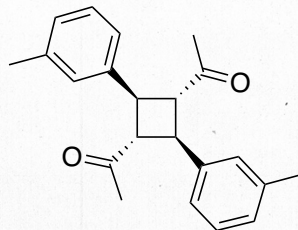

6d-B

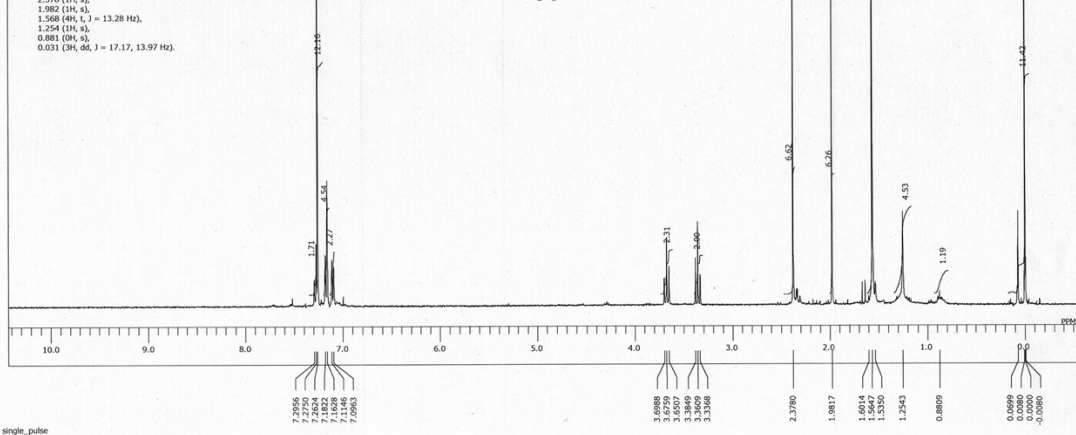

single\_pulse

YVWSVECS400data\yamada\honda\YH4-54-1-2\_Proton-1-1.xls

DFILE YH4-54-1-2\_Proton-1-1.xls  
CONNT single\_pulse  
DATIM 2022-10-26 12:51:14  
ORNUC 1H  
EXMCO proton\_300  
OBFRO 399.78 MHz  
OBSET 4.19 kHz  
OBFIN 7.29 Hz  
POINT 13110  
FREQI 6002.40 Hz  
SCANS 8  
ACQTM 2.1837 sec  
PD 5.0000 sec  
PWI 5.43 usec  
IRNUC 1H  
CTEMP 20.0 c  
SLMNT CDCL3  
EXREF 0.00 ppm  
BF 0.23 Hz  
RGAIN 50

<sup>1</sup>H-NMR (CDCl<sub>3</sub>)  $\delta$ :  
7.261 (1H, s),  
7.220-7.149 (1H, m),  
7.013 (OH, dd, J = 25.53, 6.11 Hz),  
4.756 (OH, t, J = 10.30 Hz),  
4.323 (OH, t, J = 10.07 Hz),  
3.675 (1H, t, J = 10.30 Hz),  
2.333 (2H, s),  
2.309 (1H, s),  
2.048 (OH, s),  
1.668 (2H, s),  
1.552 (1H, d, J = 12.36 Hz),  
0.031 (1H, t, J = 15.57 Hz).

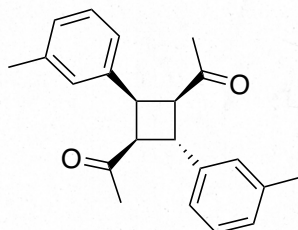

6d-E

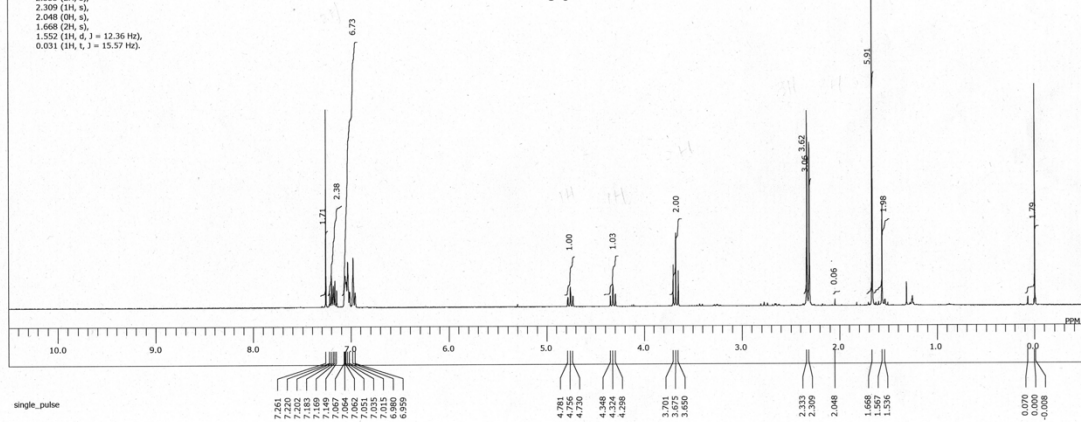

single\_pulse

\\WSVECS40\data\kyamada\honda\Y1H-61-2-1-2\_Proton-1-1.pdf

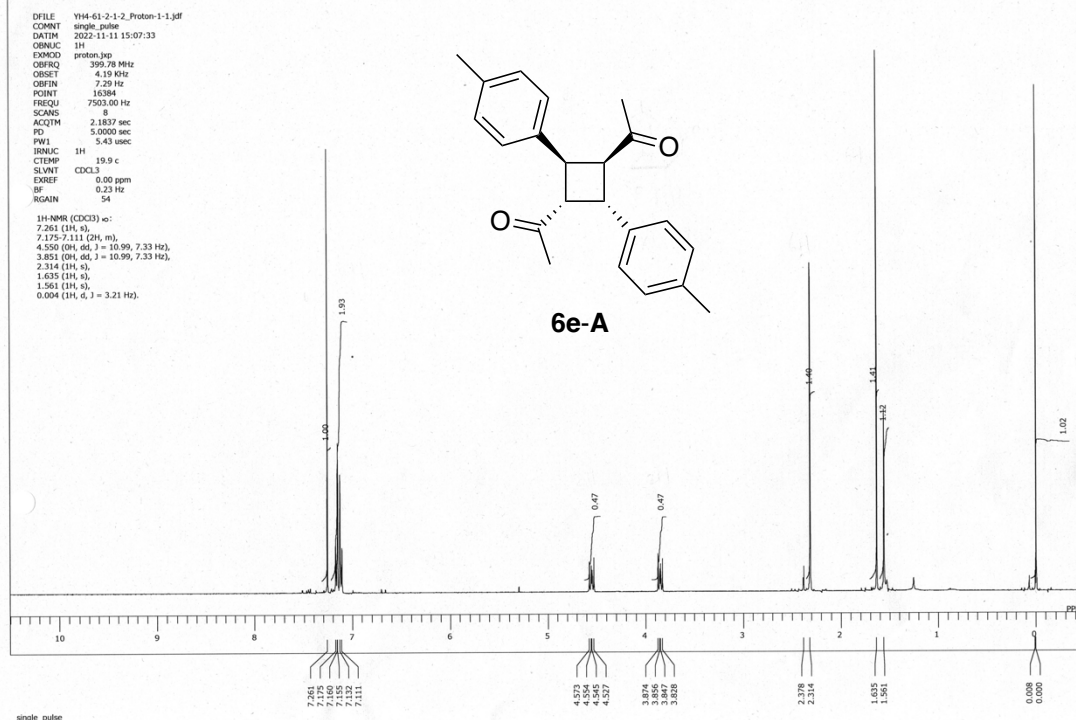

\\WSVECS40\data\kyamada\honda\Y1H-137-2-1\_Proton-1-1.pdf

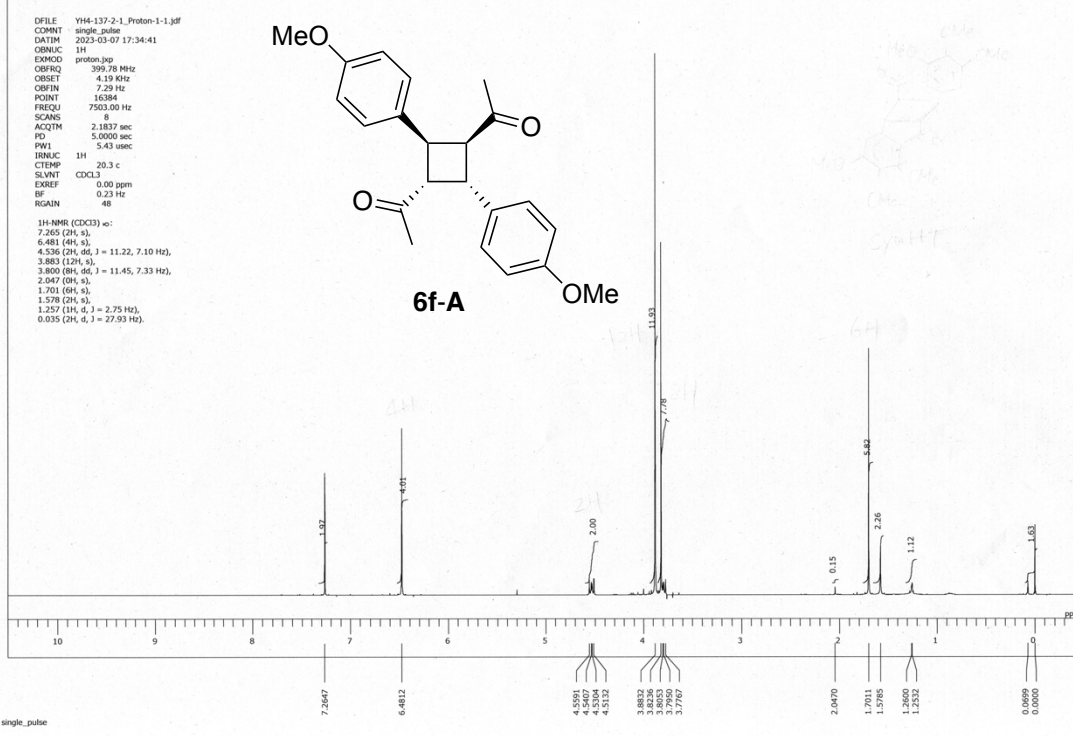



\\WSV\EC540\data\kyamada\Yhonda\YH4-137-2-1\_Proton-1-1.pdf

OFILE YH4-137-2-1\_Proton-1-1.pdf  
 CONNT single\_pulse  
 DATIM 2023-03-07 17:34:41  
 CDMUC 1H  
 ERMCO proton\_jpg  
 OBRFQ 399.78 MHz  
 CRSET 41.19 kHz  
 OBFIN 7.29 Hz  
 FPOINT 16384  
 FREQU 7503.00 Hz  
 SCANS 8  
 ACQTM 2.1837 sec  
 PD 5.0000 sec  
 PW1 5.43 usec  
 FNUC 1H  
 CTEMP 20.3 c  
 SOLVT CDCL3  
 EXREF 0.00 ppm  
 RF 0.23 Hz  
 RGAIN 48  
 1H-NMR (CDCl3)  $\delta$ :  
 7.265 (2H, s),  
 6.481 (2H, s),  
 4.536 (2H, d, J = 11.22, 7.10 Hz),  
 3.883 (12H, s),  
 3.800 (8H, dd, J = 11.45, 7.33 Hz),  
 2.047 (2H, s),  
 1.701 (2H, s),  
 1.578 (2H, s),  
 1.257 (1H, d, J = 2.75 Hz),  
 0.035 (2H, d, J = 27.93 Hz)

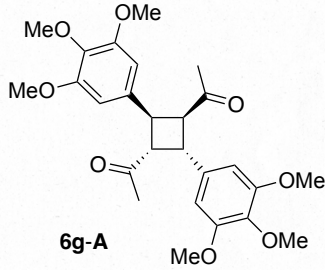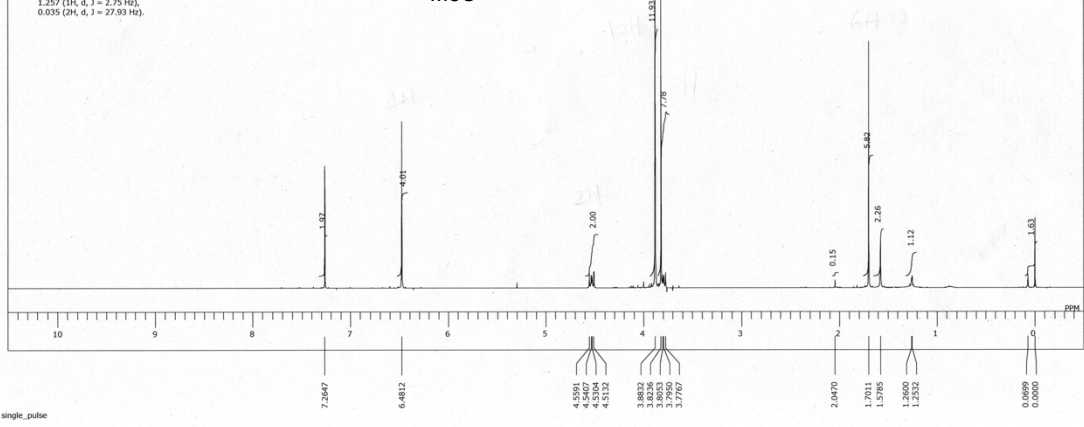

YH4-46  
 7.3246  
 7.3121  
 7.3071  
 7.2988  
 7.1603  
 7.0133  
 6.9899  
 6.9384

3.792  
 3.780  
 3.775  
 3.763  
 2.766  
 2.756  
 2.746  
 2.738  
 2.728  
 2.718  
 2.675  
 2.663  
 2.657  
 2.646  
 2.640  
 2.628  
 2.271  
 2.258  
 2.248  
 2.236  
 2.173  
 2.160  
 2.151  
 2.137  
 1.603  
 1.452  
 1.473  
 1.465  
 1.462  
 1.453  
 1.449  
 1.437  
 1.434  
 1.326  
 1.351  
 1.379  
 1.376  
 1.366  
 1.355  
 1.337  
 1.330  
 1.360  
 0.349  
 -0.005

Current Data Parameters  
 NAME 20221014  
 EXPNO 1  
 PROCNO 1  
 F2 - Acquisition Parameters  
 Date\_ 20221014  
 Time 13.31  
 INSTRUM spect  
 PROBHD 5 mm CPPBBO BB  
 PULPROG zg30  
 TD 65536  
 SOLVENT CDCl3  
 NS 32  
 DS 2  
 SWH 12019.230 Hz  
 FIDRES 0.183399 Hz  
 AQ 2.7262976 sec  
 RG 28.5  
 DW 41.600 usec  
 DE 10.00 usec  
 TE 291.5 K  
 D1 1.00000000 sec  
 TDO 1  
 ===== CHANNEL f1 =====  
 SF01 600.0337054 MHz  
 NUC1 1H  
 P1 13.50 usec  
 PLW1 22.00000000 W  
 F2 - Processing parameters  
 SI 65536  
 SF 600.0300147 MHz  
 WDW EM  
 SSB 0  
 LB 0.30 Hz  
 GB 0  
 PC 1.00

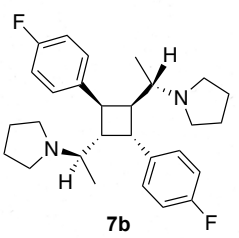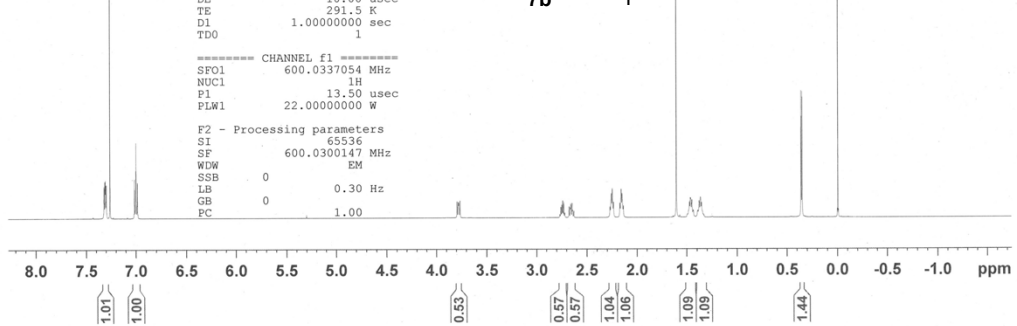

\\WS\FEC\S400\data\yamada\YH4-118-2\_Proton-1-1.jdf

DFILE YH4-118-2\_Proton-1-1.jdf  
COMNT single\_pulse  
DATIM 2023-01-12 14:15:46  
OBNUC 1H  
EXMOD proton.jxp  
OBFRQ 399.78 MHz  
OBSET 4.19 kHz  
OBFIN 7.29 Hz  
POINT 16384  
FREQU 7503.00 Hz  
SCANS 8  
ACQTM 2.1837 sec  
PD 5.0000 sec  
PWI 5.43 usec  
IRNUC 1H  
CTEMP 19.0 c  
SLVNT CDCL3  
EXREF 0.00 ppm  
BF 0.23 Hz  
RGAIN 50

1H NMR (CDCl3)  $\delta$ :  
7.400 (2H, td, J = 5.84, 2.44 Hz),  
7.281 (1H, d, J = 15.11 Hz),  
7.126-7.083 (2H, m),  
5.302 (OH, s),  
3.769 (1H, t, J = 7.36 Hz),  
3.420 (1H, dd, J = 9.29, 7.56 Hz),  
2.822 (1H, dd, J = 16.04, 9.62 Hz),  
2.048 (OH, s),  
1.568 (1H, s),  
1.137 (1H, d, J = 12.51 Hz),  
0.907 (3H, d, J = 6.41 Hz),  
0.035 (1H, t, J = 13.97 Hz).

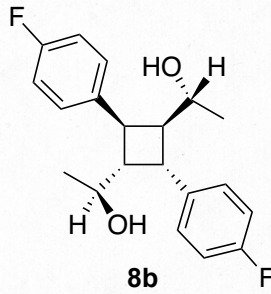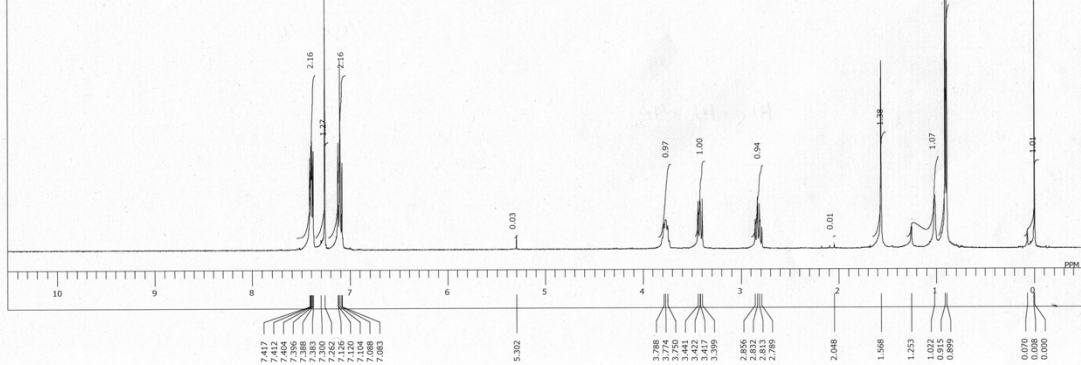

single\_pulse

\\WS\Users\delta\Documents\JEOL\data\yamada\yamada\SY1-1-4\_Proton-1-1.als

DFILE SY1-1-4\_Proton-1-1.als  
COMNT single\_pulse  
DATIM 2023-04-26 11:46:38  
OBNUC 1H  
EXMOD proton.jxp  
OBFRQ 500.16 MHz  
OBSET 2.41 kHz  
OBFIN 6.01 Hz  
POINT 32767  
FREQU 9384.38 Hz  
SCANS 16  
ACQTM 3.4918 sec  
PD 5.0000 sec  
PWI 6.25 usec  
IRNUC 1H  
CTEMP 21.6 c  
SLVNT CDCL3  
EXREF 0.00 ppm  
BF 0.14 Hz  
RGAIN 50

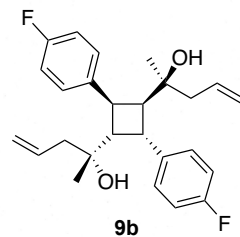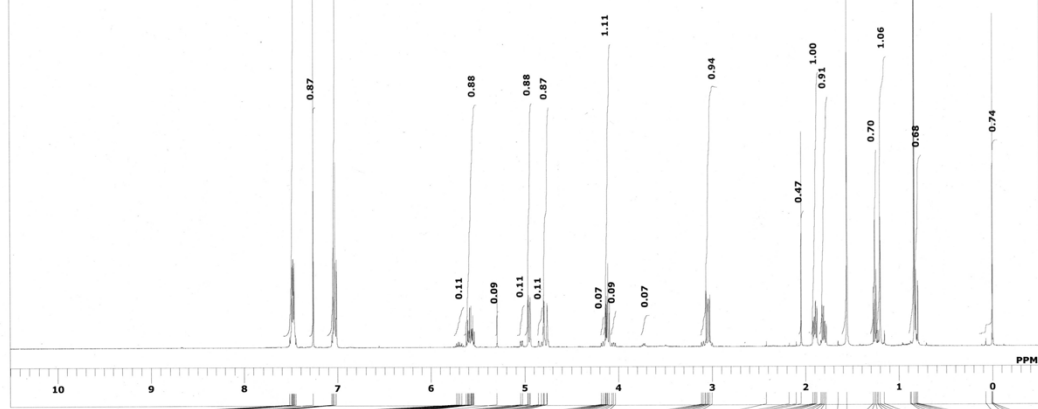

single\_pulse

## 10. X-ray crystallographic data for 2a, 3a-3h and 6a-6h, and their crystal packing diagrams

### Summary for 2a

Formula: C13 H16 O3 N1 F3 S1

#### \*\*\*\*\* Unit Cell Parameters \*\*\*\*\*

a: 7.1898(2)  
b: 10.2610(3)  
c: 10.7376(3)  
alpha: 82.873(2)  
beta: 81.112(2)  
gamma: 73.186(2)  
volume: 746.55(4)

#### \*\*\*\*\* Model Refinement \*\*\*\*\*

R1 factor[I>2.0sigma(I)]: 0.0463  
R factor[all data]: 0.0580  
wR factor[all data]: 0.1566  
goodness of fit: 1.120  
# of observations: 2670  
# of variables: 193  
refl/para ratio: 13.8  
maximum shift/error: 0.00  
Refinement program: SHELXL 2014/7  
Refinement mode: Single

#### \*\*\*\*\* Space Group Information \*\*\*\*\*

symbol: P-1  
number: 2  
centricity: centric  
Z value: 2  
formula weight: 323.33  
calculated density: 1.438  
mu (cm-1): 23.391  
crystal system: triclinic  
laue group: -1  
lattice type: P

#### \*\*\*\*\* Reflection Corrections \*\*\*\*\*

absorption applied: Yes  
abs. type: SYM  
abs. range: 0.778-1.000  
decay applied: No  
decay (%): 0.00  
redundants averaged: Yes

#### \*\*\*\*\* Reflection Processing \*\*\*\*\*

total # processed: 8508  
total # unique: 2670  
R merge (%): 5.31  
Wilson B: 2.29

#### \*\*\*\*\* Experimental Information \*\*\*\*\*

radiation: Cu  
wavelength: 1.54187  
max. 2theta: 136.5  
sin(theta)/lambda: 0.6024  
temperature (C): -150.0

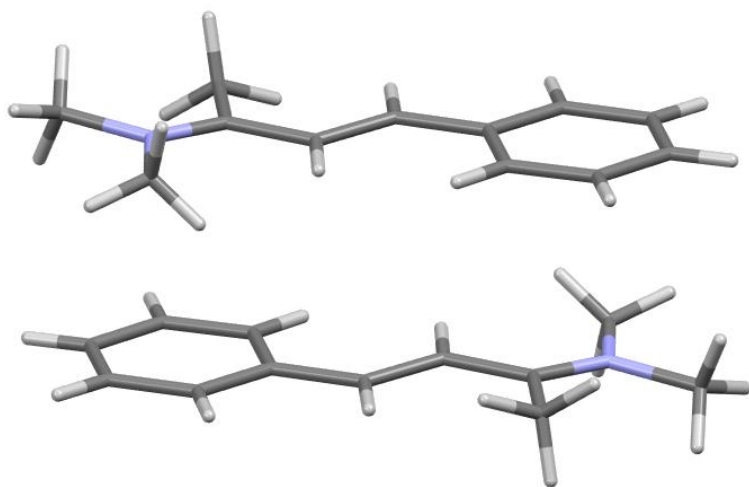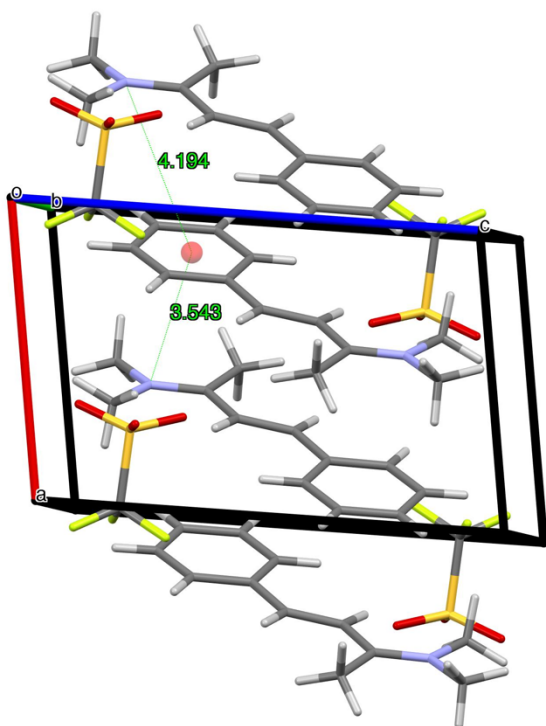

Side view

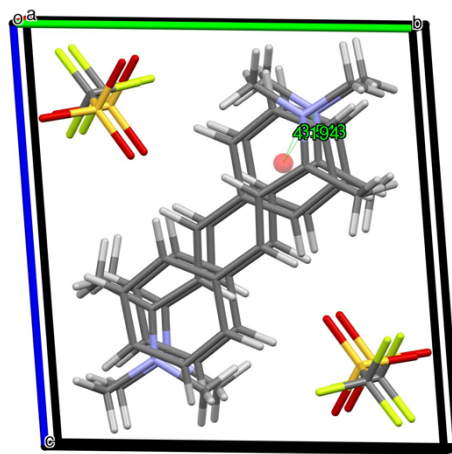

Top view

Summary for **3a**

Formula: C14 H18 N1 B1 F4

\*\*\*\*\* Unit Cell Parameters \*\*\*\*\*

|         |             |
|---------|-------------|
| a:      | 8.57365(16) |
| b:      | 16.3060(3)  |
| c:      | 9.96321(18) |
| alpha:  | 90.000      |
| beta:   | 90.6392(10) |
| gamma:  | 90.000      |
| volume: | 1392.79(4)  |

\*\*\*\*\* Model Refinement \*\*\*\*\*

|                           |               |
|---------------------------|---------------|
| R1 factor[I>2.0sigma(I)]: | 0.0512        |
| R factor[all data]:       | 0.0769        |
| wR factor[all data]:      | 0.1417        |
| goodness of fit:          | 1.123         |
| # of observations:        | 2500          |
| # of variables:           | 183           |
| refl/para ratio:          | 13.7          |
| maximum shift/error:      | 0.00          |
| Refinement program:       | SHELXL 2014/7 |
| Refinement mode:          | Single        |

\*\*\*\*\* Space Group Information \*\*\*\*\*

|                     |            |
|---------------------|------------|
| symbol:             | P21/n      |
| number:             | 14         |
| centricity:         | centric    |
| Z value:            | 4          |
| formula weight:     | 287.11     |
| calculated density: | 1.369      |
| mu (cm-1):          | 9.992      |
| crystal system:     | monoclinic |
| laue group:         | 2/m        |
| lattice type:       | P          |

\*\*\*\*\* Reflection Corrections \*\*\*\*\*

|                      |             |
|----------------------|-------------|
| absorption applied:  | Yes         |
| abs. type:           | SYM         |
| abs. range:          | 0.896-1.000 |
| decay applied:       | No          |
| decay (%):           | 0.00        |
| redundants averaged: | Yes         |

\*\*\*\*\* Reflection Processing \*\*\*\*\*

|                    |       |
|--------------------|-------|
| total # processed: | 22881 |
| total # unique:    | 2500  |
| R merge (%):       | 3.80  |
| Wilson B:          | 3.02  |

\*\*\*\*\* Experimental Information \*\*\*\*\*

|                    |         |
|--------------------|---------|
| radiation:         | Cu      |
| wavelength:        | 1.54187 |
| max. 2theta:       | 136.5   |
| sin(theta)/lambda: | 0.6023  |
| temperature (C):   | -150.0  |

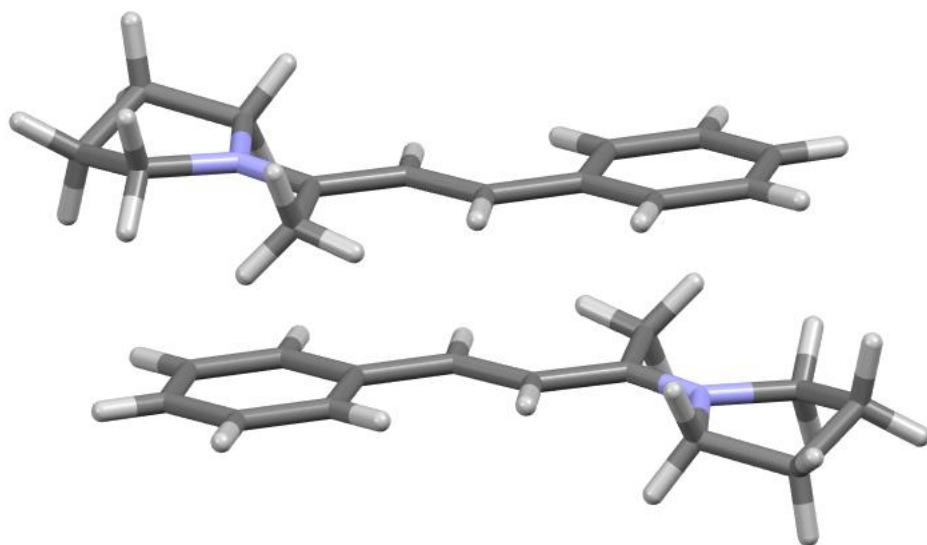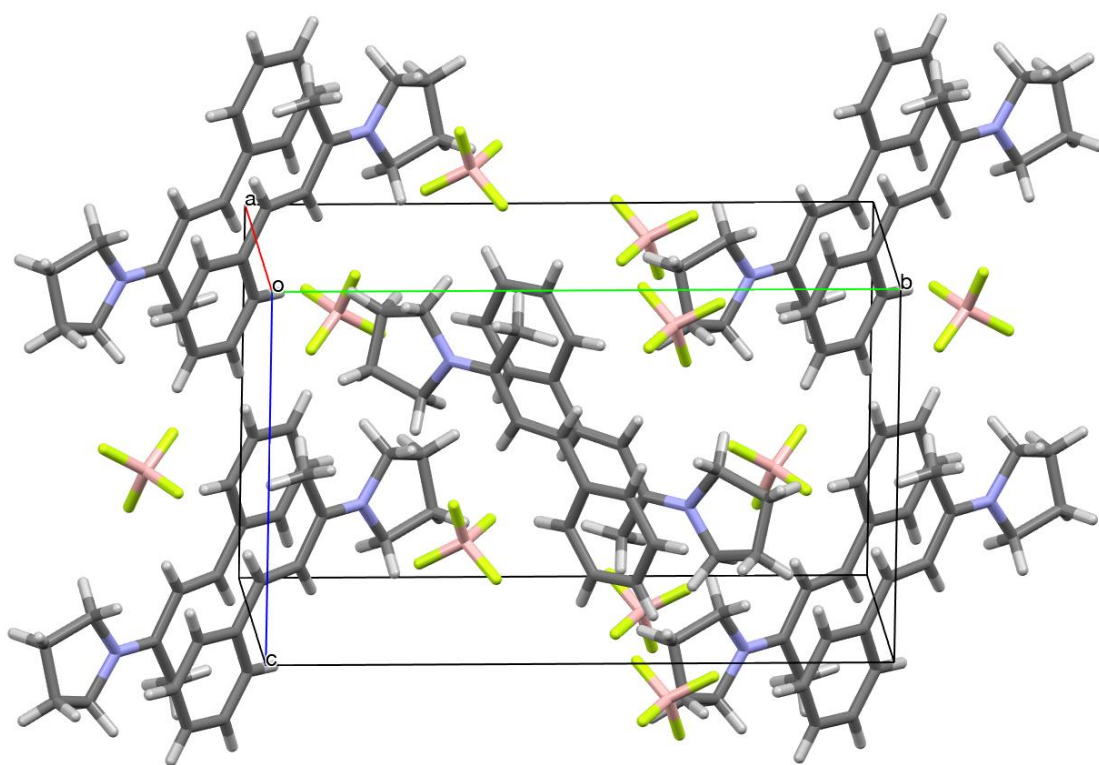

Summary for **3b**

Formula: C14 H17 N1 B1 F5

\*\*\*\*\* Unit Cell Parameters \*\*\*\*\*

a: 8.51495(19)  
b: 16.4158(4)  
c: 10.0399(3)  
alpha: 90.000  
beta: 90.7420(15)  
gamma: 90.000  
volume: 1403.26(6)

\*\*\*\*\* Space Group Information \*\*\*\*\*

symbol: P21/n  
number: 14  
centricity: centric  
Z value: 4  
formula weight: 305.10  
calculated density: 1.444  
mu (cm-1): 11.336  
crystal system: monoclinic  
laue group: 2/m  
lattice type: P

\*\*\*\*\* Reflection Processing \*\*\*\*\*

total # processed: 15309  
total # unique: 2566  
R merge (%): 5.19  
Wilson B: 2.09

\*\*\*\*\* Model Refinement \*\*\*\*\*

R1 factor[I>2.0sigma(I)]: 0.0435  
R factor[all data]: 0.0642  
wR factor[all data]: 0.1119  
goodness of fit: 1.142  
# of observations: 2566  
# of variables: 191  
refl/paratio: 13.4  
maximum shift/error: 0.00  
Refinement program: SHELXL 2014/7  
Refinement mode: Single

\*\*\*\*\* Reflection Corrections \*\*\*\*\*

absorption applied: Yes  
abs. type: SYM  
abs. range: 0.714-1.000  
decay applied: No  
decay (%): 0.00  
redundants averaged: Yes

\*\*\*\*\* Experimental Information \*\*\*\*\*

radiation: Cu  
wavelength: 1.54187  
max. 2theta: 136.4  
sin(theta)/lambda: 0.6022  
temperature (C): -150.0

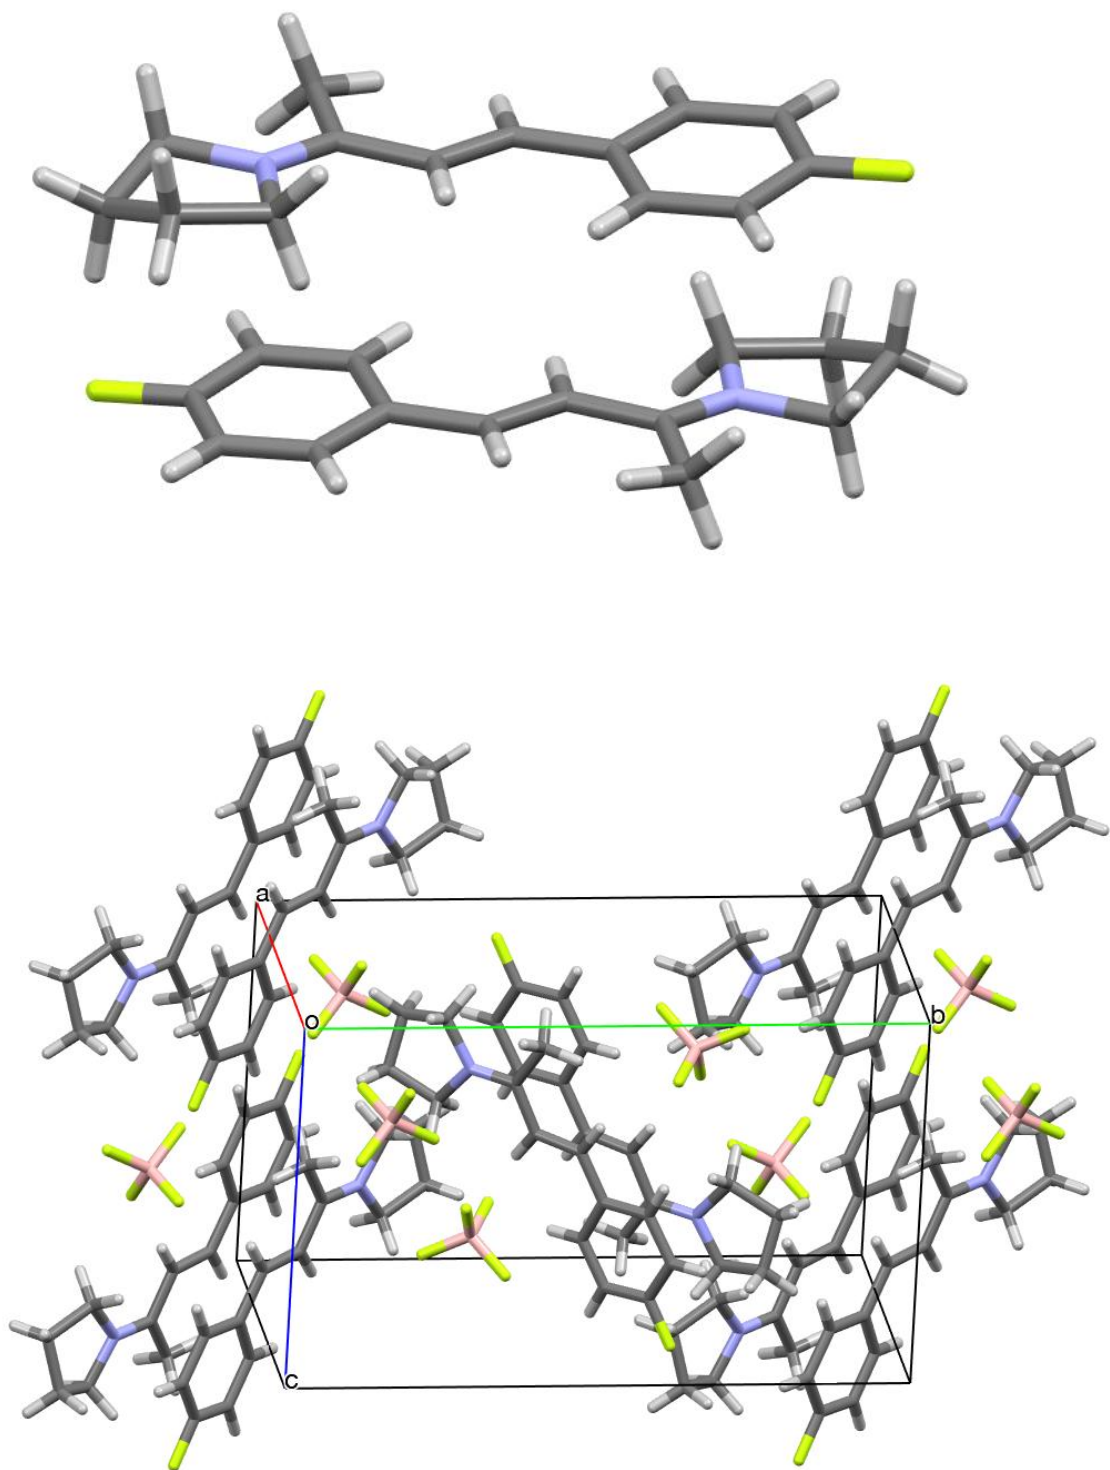



Summary for **3c**

Formula: C15 H20 N1 B1 F4

\*\*\*\*\* Unit Cell Parameters \*\*\*\*\*

|         |            |
|---------|------------|
| a:      | 7.5602(3)  |
| b:      | 15.2074(5) |
| c:      | 12.6685(5) |
| alpha:  | 90.000     |
| beta:   | 95.164(2)  |
| gamma:  | 90.000     |
| volume: | 1450.60(9) |

\*\*\*\*\* Model Refinement \*\*\*\*\*

|                           |               |
|---------------------------|---------------|
| R1 factor[I>2.0sigma(I)]: | 0.0734        |
| R factor[all data]:       | 0.0998        |
| wR factor[all data]:      | 0.2621        |
| goodness of fit:          | 1.198         |
| # of observations:        | 2641          |
| # of variables:           | 192           |
| refl/para ratio:          | 13.8          |
| maximum shift/error:      | 0.00          |
| Refinement program:       | SHELXL 2014/7 |
| Refinement mode:          | Single        |

\*\*\*\*\* Space Group Information \*\*\*\*\*

|                     |            |
|---------------------|------------|
| symbol:             | P21/n      |
| number:             | 14         |
| centricity:         | centric    |
| Z value:            | 4          |
| formula weight:     | 301.13     |
| calculated density: | 1.379      |
| mu (cm-1):          | 9.845      |
| crystal system:     | monoclinic |
| laue group:         | 2/m        |
| lattice type:       | P          |

\*\*\*\*\* Reflection Corrections \*\*\*\*\*

|                      |             |
|----------------------|-------------|
| absorption applied:  | Yes         |
| abs. type:           | SYM         |
| abs. range:          | 0.850-1.000 |
| decay applied:       | No          |
| decay (%):           | 0.00        |
| redundants averaged: | Yes         |

\*\*\*\*\* Reflection Processing \*\*\*\*\*

|                    |       |
|--------------------|-------|
| total # processed: | 16580 |
| total # unique:    | 2641  |
| R merge (%):       | 5.78  |
| Wilson B:          | 3.51  |

\*\*\*\*\* Experimental Information \*\*\*\*\*

|                    |         |
|--------------------|---------|
| radiation:         | Cu      |
| wavelength:        | 1.54187 |
| max. 2theta:       | 136.5   |
| sin(theta)/lambda: | 0.6024  |
| temperature (C):   | -150.0  |

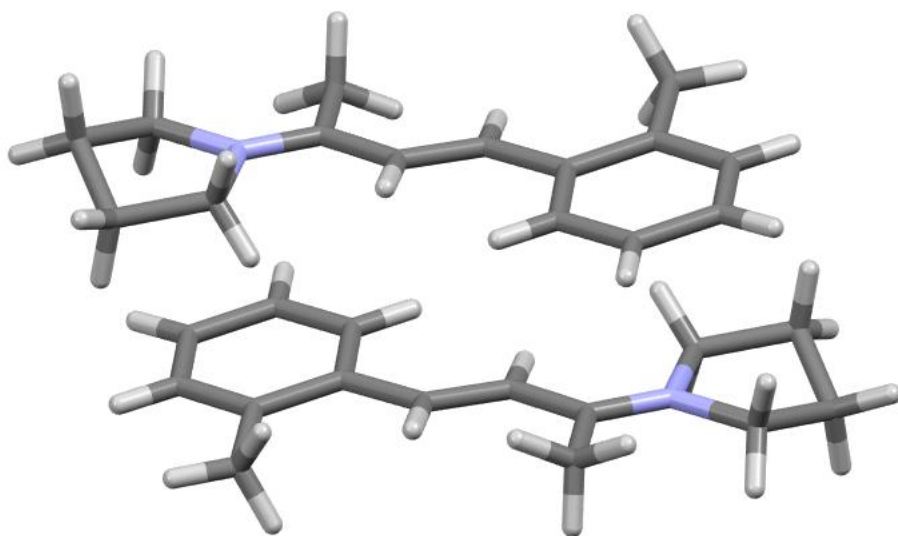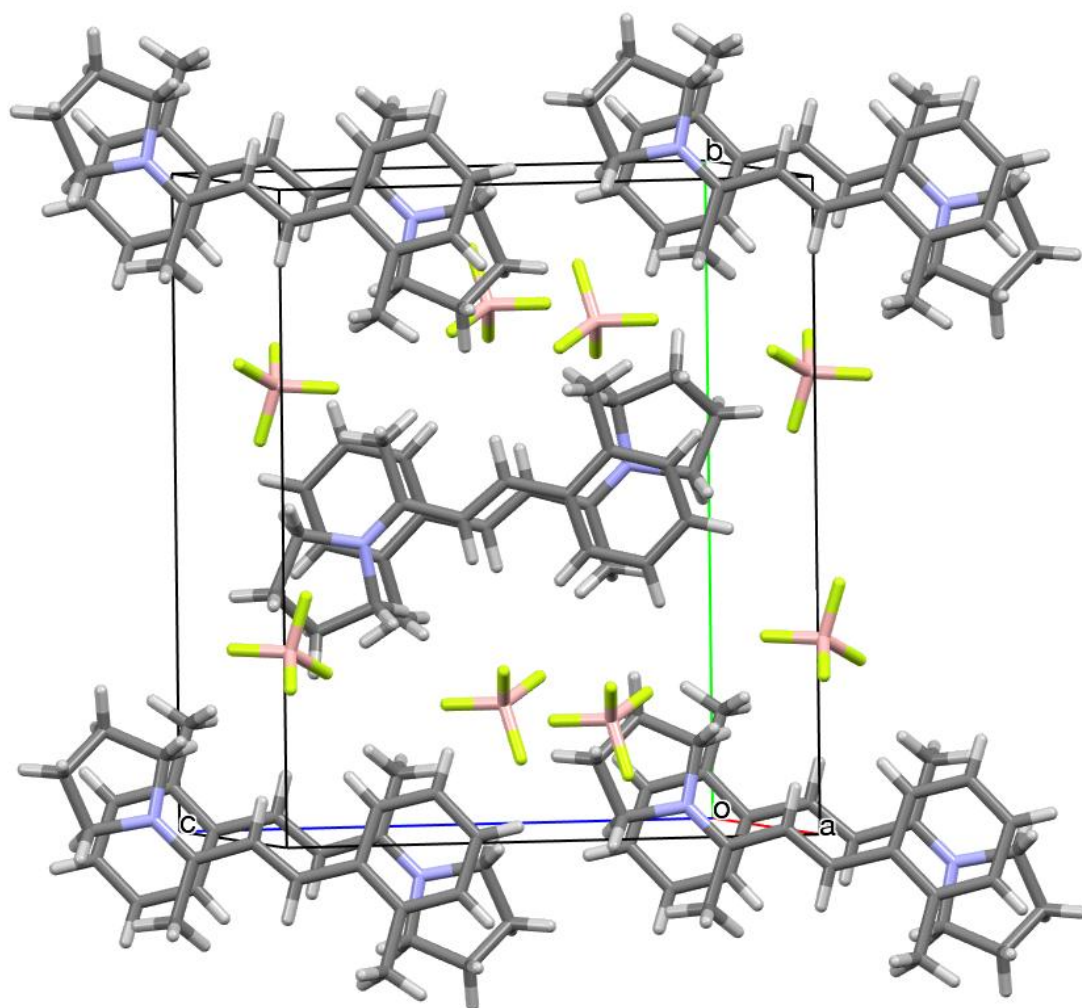

Summary for **3d**

Formula: C15 H20 N1 B1 F4

\*\*\*\*\* Unit Cell Parameters \*\*\*\*\*

a: 10.0997(3)  
b: 8.3125(2)  
c: 17.8495(6)  
alpha: 90.000  
beta: 96.1210(19)  
gamma: 90.000  
volume: 1489.99(7)

\*\*\*\*\* Model Refinement \*\*\*\*\*

R1 factor[I>2.0sigma(I)]: 0.0771  
R factor[all data]: 0.0969  
wR factor[all data]: 0.2424  
goodness of fit: 1.103  
# of observations: 2438  
# of variables: 192  
refl/para ratio: 12.7  
maximum shift/error: 0.00  
Refinement program: SHELXL 2014/7  
Refinement mode: Single

\*\*\*\*\* Space Group Information \*\*\*\*\*

symbol: P21/c  
number: 14  
centricity: centric  
Z value: 4  
formula weight: 301.13  
calculated density: 1.342  
mu (cm-1): 9.585  
crystal system: monoclinic  
laue group: 2/m  
lattice type: P

\*\*\*\*\* Reflection Corrections \*\*\*\*\*

absorption applied: Yes  
abs. type: SYM  
abs.range: 0.538-1.000  
decay applied: No  
decay (%): 0.00  
redundants averaged: Yes

\*\*\*\*\* Reflection Processing \*\*\*\*\*

total # processed: 8976  
total # unique: 2438  
R merge (%): 7.48  
Wilson B: 3.27

\*\*\*\*\* Experimental Information \*\*\*\*\*

radiation: Cu  
wavelength: 1.54187  
max. 2theta: 136.5  
sin(theta)/lambda: 0.6023  
temperature (C): -150.0

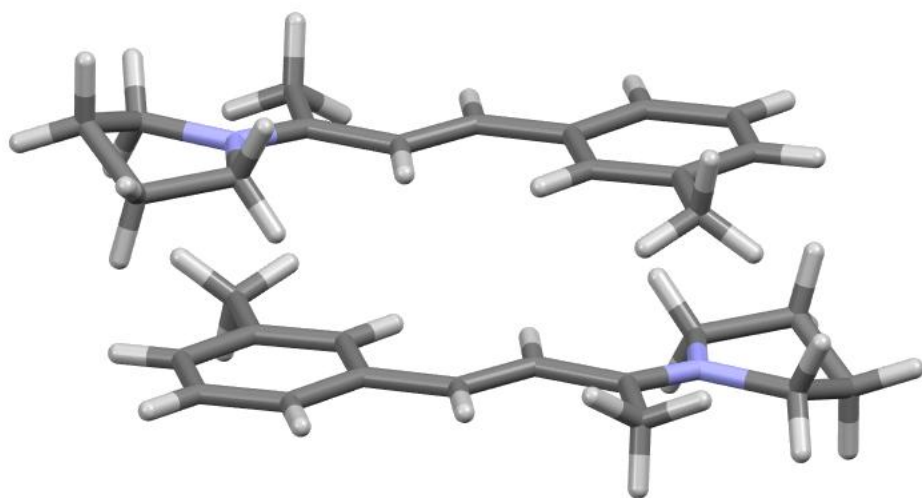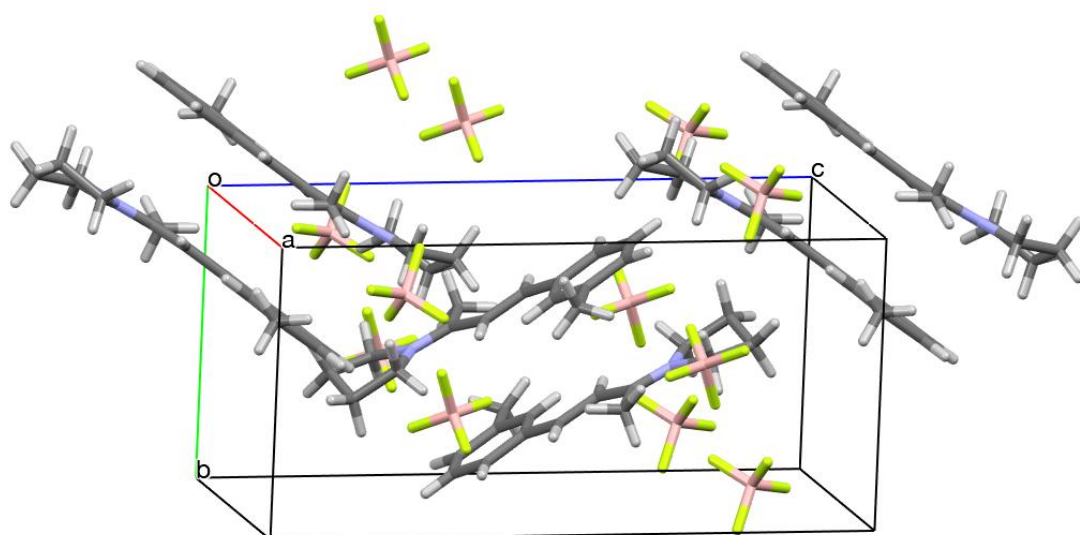

Summary for **3e**

Formula: C15 H20 N1 B1 F4

\*\*\*\*\* Unit Cell Parameters \*\*\*\*\*

|         |             |
|---------|-------------|
| a:      | 10.1100(2)  |
| b:      | 8.7342(2)   |
| c:      | 16.7607(4)  |
| alpha:  | 90.000      |
| beta:   | 90.8200(15) |
| gamma:  | 90.000      |
| volume: | 1479.87(6)  |

\*\*\*\*\* Model Refinement \*\*\*\*\*

|                           |               |
|---------------------------|---------------|
| R1 factor[I>2.0sigma(I)]: | 0.0685        |
| R factor[all data]:       | 0.0833        |
| wR factor[all data]:      | 0.1933        |
| goodness of fit:          | 1.156         |
| # of observations:        | 2692          |
| # of variables:           | 192           |
| refl/para ratio:          | 14.0          |
| maximum shift/error:      | 0.00          |
| Refinement program:       | SHELXL 2014/7 |
| Refinement mode:          | Single        |

\*\*\*\*\* Space Group Information \*\*\*\*\*

|                     |            |
|---------------------|------------|
| symbol:             | P21/c      |
| number:             | 14         |
| centricity:         | centric    |
| Z value:            | 4          |
| formula weight:     | 301.13     |
| calculated density: | 1.351      |
| mu (cm-1):          | 9.651      |
| crystal system:     | monoclinic |
| laue group:         | 2/m        |
| lattice type:       | P          |

\*\*\*\*\* Reflection Corrections \*\*\*\*\*

|                      |             |
|----------------------|-------------|
| absorption applied:  | Yes         |
| abs.type:            | SYM         |
| abs. range:          | 0.897-1.000 |
| decay applied:       | No          |
| decay (%):           | 0.00        |
| redundants averaged: | Yes         |

\*\*\*\*\* Reflection Processing \*\*\*\*\*

|                    |       |
|--------------------|-------|
| total # processed: | 16192 |
| total # unique:    | 2692  |
| R merge (%):       | 4.61  |
| Wilson B:          | 2.47  |

\*\*\*\*\* Experimental Information \*\*\*\*\*

|                    |         |
|--------------------|---------|
| radiation:         | Cu      |
| wavelength:        | 1.54187 |
| max. 2theta:       | 136.4   |
| sin(theta)/lambda: | 0.6022  |
| temperature (C):   | -150.0  |

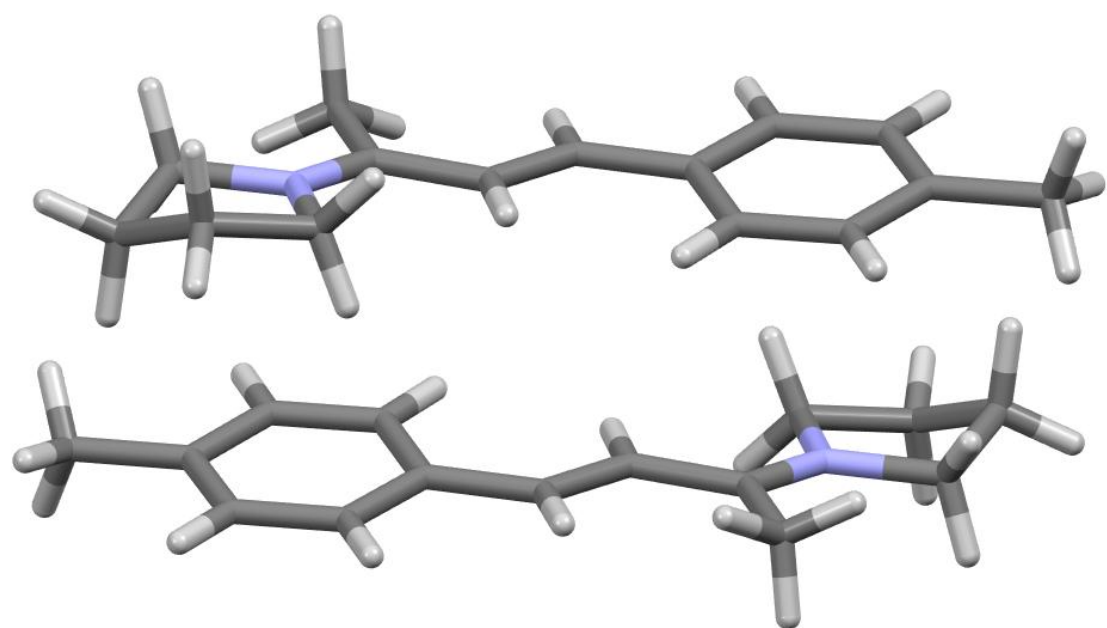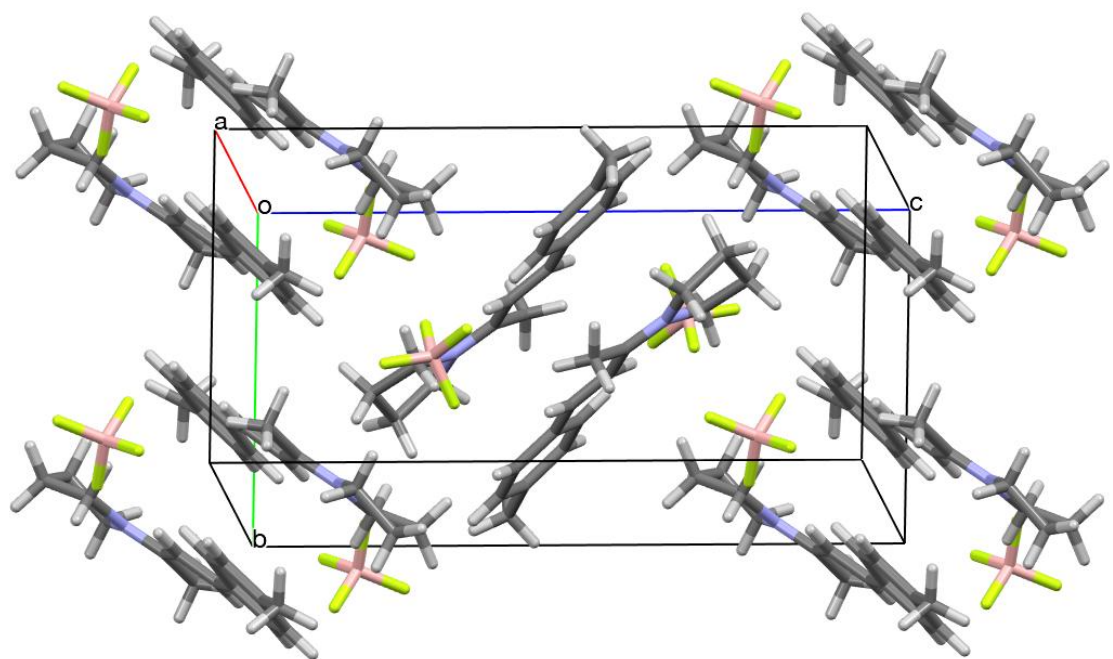

Summary for **3f**

Formula: C15 H20 O1 N1 B1 F4

\*\*\*\*\* Unit Cell Parameters \*\*\*\*\*

a: 7.63744(14)  
b: 19.6800(4)  
c: 10.11448(18)  
alpha: 90.000  
beta: 100.7280(10)  
gamma: 90.000  
volume: 1493.69(5)

\*\*\*\*\* Model Refinement \*\*\*\*\*

R1 factor[I>2.0sigma(I)]: 0.0386  
R factor[all data]: 0.0445  
wR factor[all data]: 0.1043  
goodness of fit: 1.078  
# of observations: 2723  
# of variables: 200  
refl/para ratio: 13.6  
maximum shift/error: 0.00  
Refinement program: SHELXL 2014/7  
Refinement mode: Single

\*\*\*\*\* Space Group Information \*\*\*\*\*

symbol: P21/n  
number: 14  
centricity: centric  
Z value: 4  
formula weight: 317.13  
calculated density: 1.410  
mu (cm-1): 10.379  
crystal system: monoclinic  
laue group: 2/m  
lattice type: P

\*\*\*\*\* Reflection Corrections \*\*\*\*\*

absorption applied: Yes  
abs. type: SYM  
abs.range: 0.882-1.000  
decay applied: No  
decay (%): 0.00  
redundants averaged: Yes

\*\*\*\*\* Reflection Processing \*\*\*\*\*

total # processed: 16393  
total # unique: 2723  
R merge (%): 3.72  
Wilson B: 2.07

\*\*\*\*\* Experimental Information \*\*\*\*\*

radiation: Cu  
wavelength: 1.54187  
max. 2theta: 136.5  
sin(theta)/lambda: 0.6023  
temperature (C): -150.0

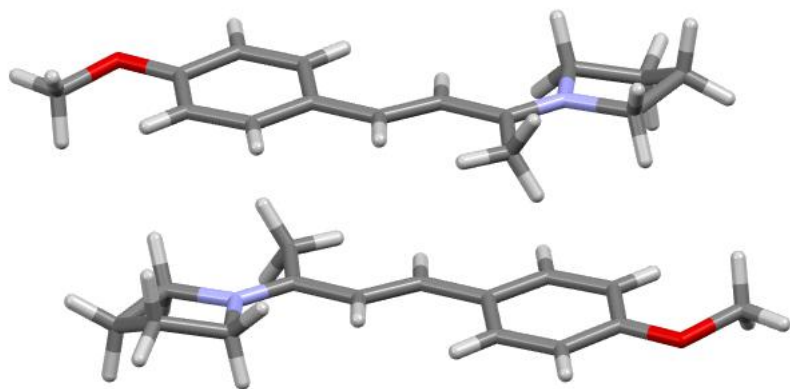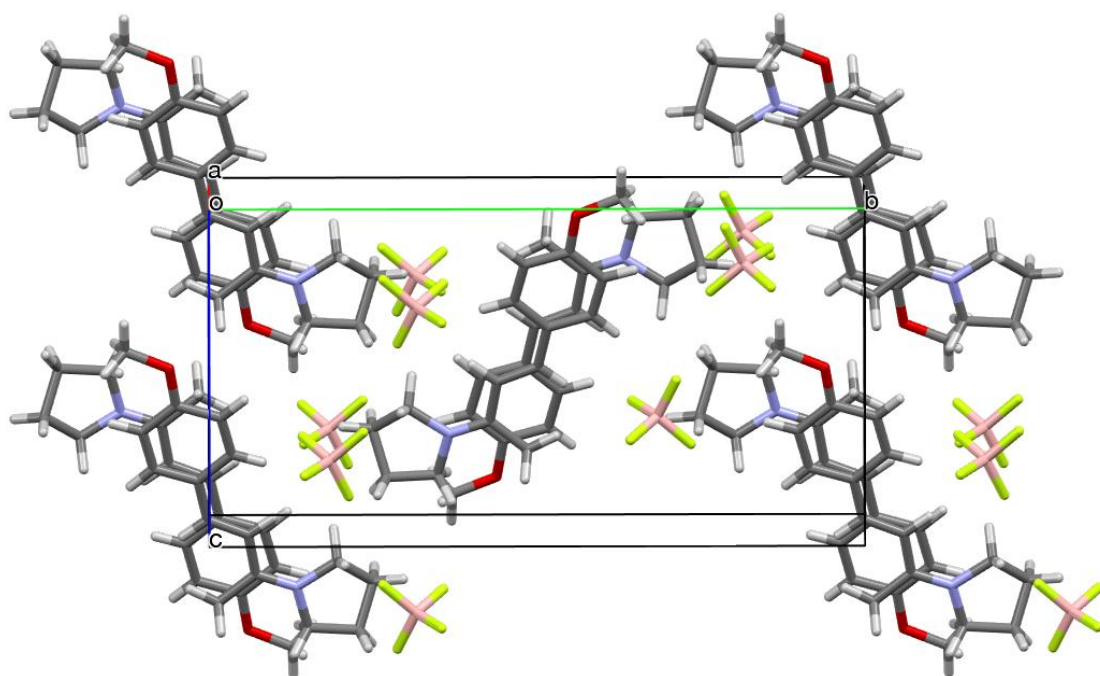



Summary for **3g**

Formula: C17 H24 B1 F4 N1 O3

\*\*\*\*\* Unit Cell Parameters \*\*\*\*\*

a: 7.6902(3)  
b: 9.9674(3)  
c: 12.0352(4)  
alpha: 94.287(2)  
beta: 96.2441(19)  
gamma: 96.7987(19)  
volume: 906.99(5)

\*\*\*\*\* Model Refinement \*\*\*\*\*

R1 factor[I>2.0sigma(I)]: 0.0593  
R factor[all data]: 0.0925  
wR factor[all data]: 0.1591  
goodness of fit: 1.094  
# of observations: 3237  
# of variables: 239  
refl/para ratio: 13.5  
maximum shift/error: 0.00  
Refinement program: SHELXL 2014/7  
Refinement mode: Single

\*\*\*\*\* Space Group Information \*\*\*\*\*

symbol: P-1  
number: 2  
centricity: centric  
Z value: 2  
formula weight: 377.19  
calculated density: 1.381  
mu (cm-1): 10.296  
crystal system: triclinic  
laue group: -1  
lattice type: P

\*\*\*\*\* Reflection Corrections \*\*\*\*\*

absorption applied: Yes  
abs. type: SYM  
abs. range: 0.847-1.000  
decay applied: No  
decay (%): 0.00  
redundants averaged: Yes

\*\*\*\*\* Reflection Processing \*\*\*\*\*

total # processed: 9485  
total # unique: 3237  
R merge (%): 5.77  
Wilson B: 2.65

\*\*\*\*\* Experimental Information \*\*\*\*\*

radiation: Cu  
wavelength: 1.54187  
max. 2theta: 136.4  
sin(theta)/lambda: 0.6022  
temperature (C): -150.0

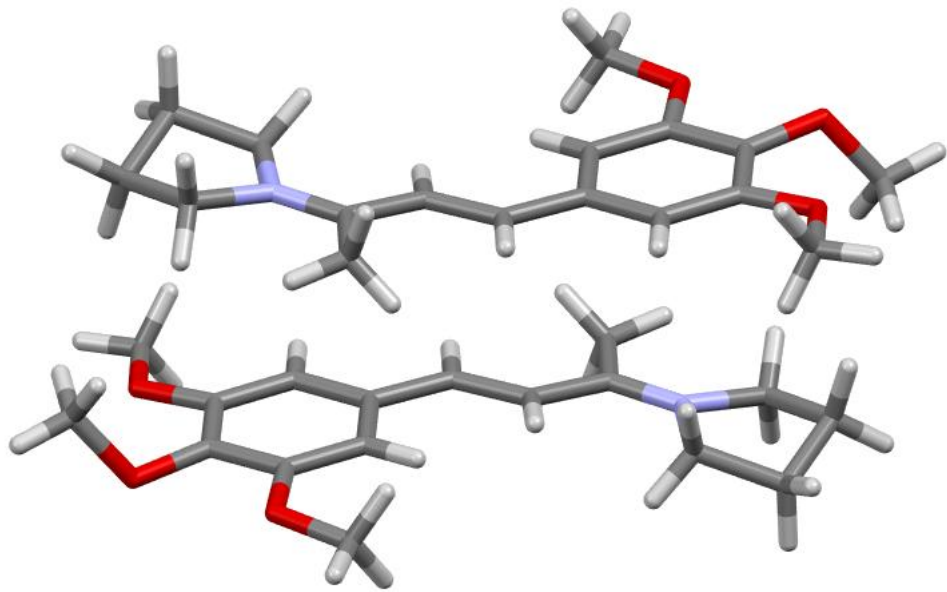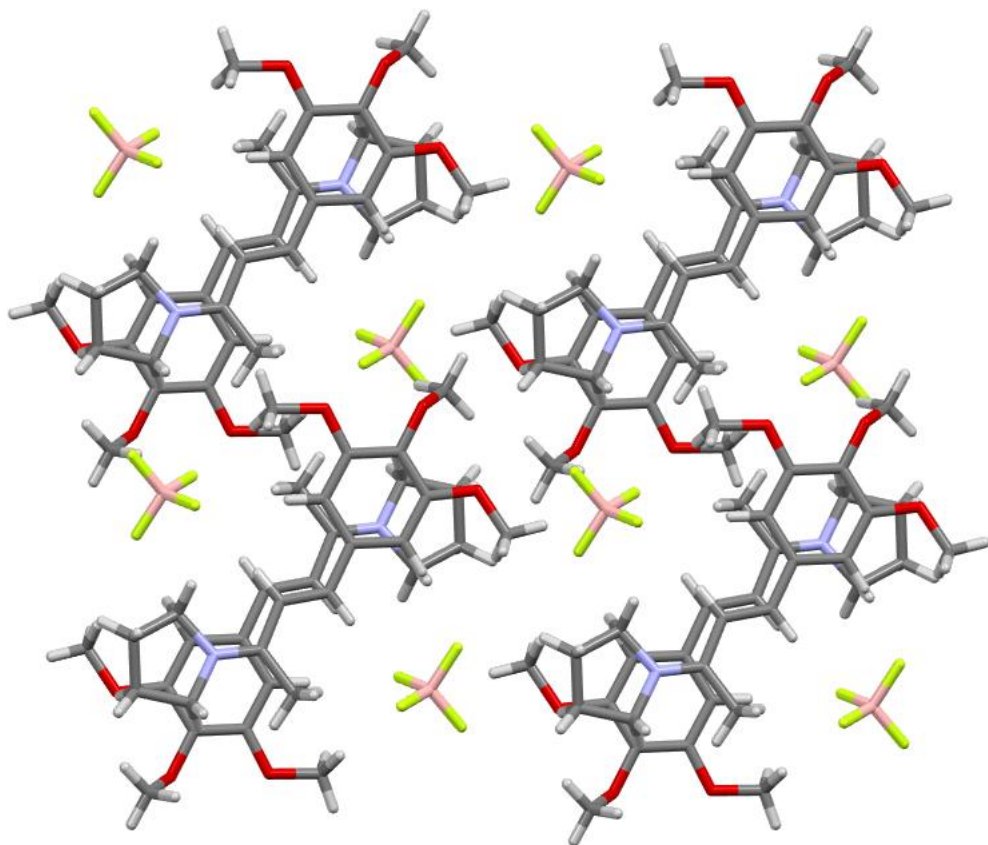

Summary for **3h**

Formula: C16 H25 N2 B1 F4 O1

\*\*\*\*\* Unit Cell Parameters \*\*\*\*\*

|         |          |
|---------|----------|
| a:      | 6.7623   |
| b:      | 19.1113  |
| c:      | 13.5883  |
| alpha:  | 90.000   |
| beta:   | 99.365   |
| gamma:  | 90.000   |
| volume: | 1732.694 |

\*\*\*\*\* Model Refinement \*\*\*\*\*

|                           |               |
|---------------------------|---------------|
| R1 factor[I>2.0sigma(I)]: | 0.0779        |
| R factor[all data]:       | 0.0950        |
| wR factor[alldata]:       | 0.2548        |
| goodness of fit:          | 1.143         |
| # of observations:        | 3119          |
| # of variables:           | 220           |
| refl/para ratio:          | 14.2          |
| maximum shift/error:      | 0.00          |
| Refinement program:       | SHELXL 2014/7 |
| Refinement mode:          | Single        |

\*\*\*\*\* Space Group Information \*\*\*\*\*

|                     |            |
|---------------------|------------|
| symbol:             | P21/n      |
| number:             | 14         |
| centricity:         | centric    |
| Z value:            | 4          |
| formula weight:     | 348.19     |
| calculated density: | 1.335      |
| mu (cm-1):          | 9.562      |
| crystal system:     | monoclinic |
| laue group:         | 2/m        |
| lattice type:       | P          |

\*\*\*\*\* Reflection Corrections \*\*\*\*\*

|                      |             |
|----------------------|-------------|
| absorption applied:  | Yes         |
| abs. type:           | SYM         |
| abs. range:          | 0.863-1.000 |
| decay applied:       | No          |
| decay (%):           | 0.00        |
| redundants averaged: | Yes         |

\*\*\*\*\* Reflection Processing \*\*\*\*\*

|                    |       |
|--------------------|-------|
| total # processed: | 19286 |
| total # unique:    | 3119  |
| R merge (%):       | 5.01  |
| Wilson B:          | 3.51  |

\*\*\*\*\* Experimental Information \*\*\*\*\*

|                    |         |
|--------------------|---------|
| radiation:         | Cu      |
| wavelength:        | 1.54187 |
| max. 2theta:       | 136.5   |
| sin(theta)/lambda: | 0.6023  |
| temperature (C):   | -150.0  |

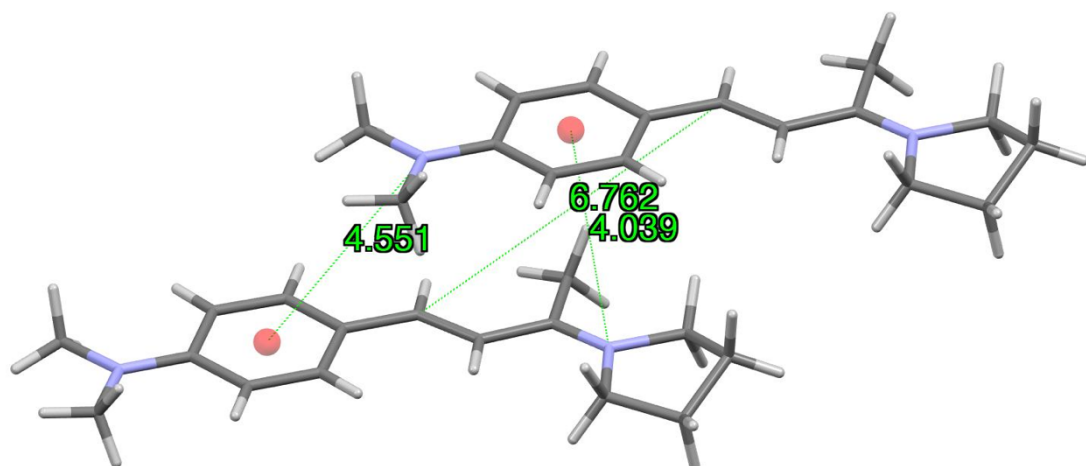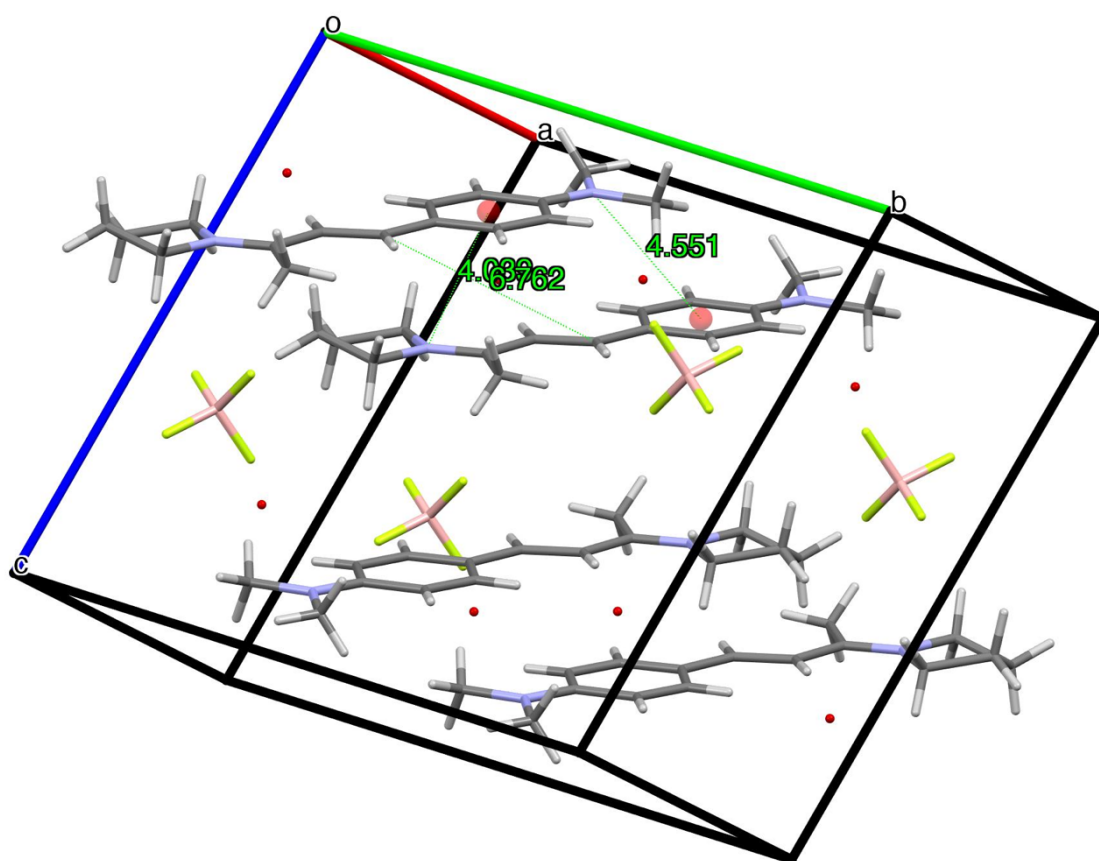

Summary for **5a**

Formula: C28 H36 N2 B2 F8

\*\*\*\*\* Unit Cell Parameters \*\*\*\*\*

a: 7.1302(3)  
b: 14.6918(5)  
c: 13.1044(4)  
alpha: 90.000  
beta: 101.392(2)  
gamma: 90.000  
volume: 1345.71(8)

\*\*\*\*\* Model Refinement \*\*\*\*\*

R1 factor[I>2.0sigma(I)]: 0.0448  
R factor[all data]: 0.0579  
wR factor[all data]: 0.1348  
goodness of fit: 1.117  
# of observations: 4732  
# of variables: 363  
refl/para ratio: 13.0  
maximum shift/error: 0.00  
Refinement program: SHELXL 2014/7  
Refinement mode: Single  
Flack Parameter: 0.48(19)

\*\*\*\*\* Space Group Information \*\*\*\*\*

symbol: P21  
number: 4  
centricity: acentric  
Z value: 2  
formula weight: 574.21  
calculated density: 1.417  
mu (cm-1): 10.341  
crystal system: monoclinic  
laue group: 2/m  
lattice type: P

\*\*\*\*\* Reflection Corrections \*\*\*\*\*

absorption applied: Yes  
abs. type: SYM  
abs. range: 0.864-1.000  
decay applied: No  
decay(%): 0.00  
redundants averaged: Yes

\*\*\*\*\* Reflection Processing \*\*\*\*\*

total # processed: 15256  
total # unique: 4732  
R merge (%): 2.95  
Wilson B: 3.07

\*\*\*\*\* Experimental Information \*\*\*\*\*

radiation: Cu  
wavelength: 1.54187  
max. 2theta: 136.5  
sin(theta)/lambda: 0.6023  
temperature (C): -150.0

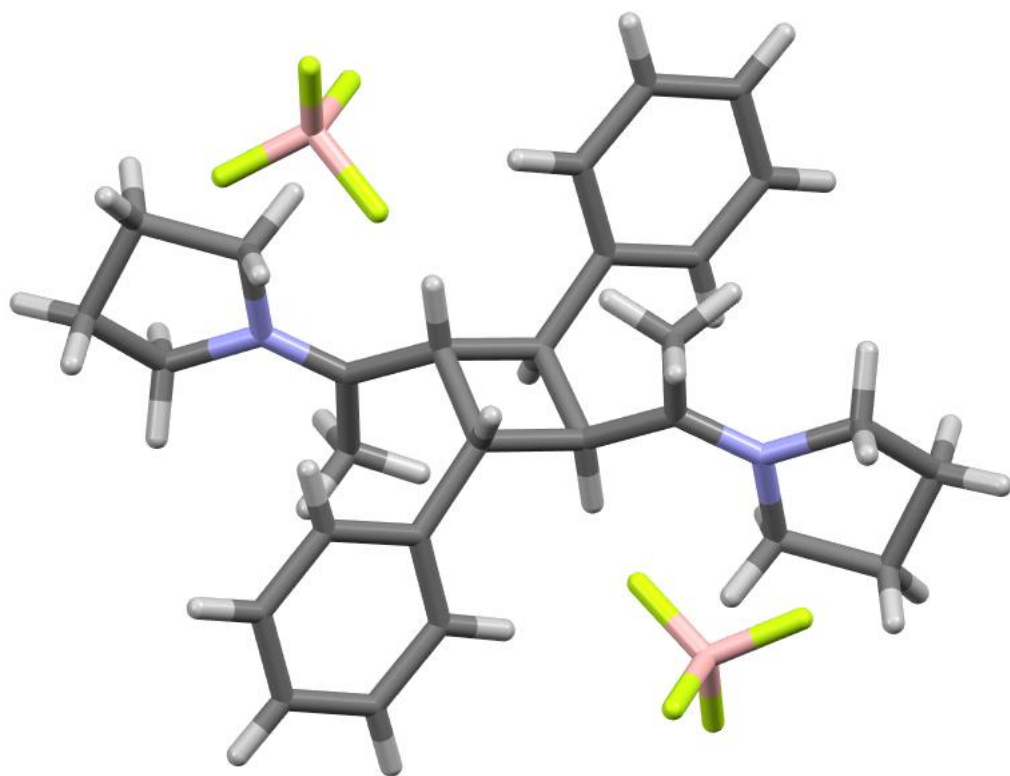

Summary for **syn-6a**

Formula: C20 H20 O2

\*\*\*\*\* Unit Cell Parameters \*\*\*\*\*

|         |            |
|---------|------------|
| a:      | 9.0741(4)  |
| b:      | 13.3976(5) |
| c:      | 9.2157(3)  |
| alpha:  | 90.000     |
| beta:   | 115.370(3) |
| gamma:  | 90.000     |
| volume: | 1012.31(7) |

\*\*\*\*\* Model Refinement \*\*\*\*\*

|                           |               |
|---------------------------|---------------|
| R1 factor[I>2.0sigma(I)]: | 0.0423        |
| R factor[all data]:       | 0.0561        |
| wR factor[all data]:      | 0.1003        |
| goodness of fit:          | 1.100         |
| # of observations:        | 3514          |
| # of variables:           | 256           |
| refl/para ratio:          | 13.7          |
| maximum shift/error:      | 0.19          |
| Refinement program:       | SHELXL 2014/7 |
| Refinement mode:          | Single        |
| Flack Parameter:          | 0.0(7)        |

\*\*\*\*\* Space Group Information \*\*\*\*\*

|                     |            |
|---------------------|------------|
| symbol:             | P21        |
| number:             | 4          |
| centricity:         | acentric   |
| Z value:            | 2          |
| formula weight:     | 292.38     |
| calculated density: | 0.959      |
| mu (cm-1):          | 4.787      |
| crystal system:     | monoclinic |
| laue group:         | 2/m        |
| lattice type:       | P          |

\*\*\*\*\* Reflection Corrections \*\*\*\*\*

|                      |             |
|----------------------|-------------|
| absorption applied:  | Yes         |
| abs. type:           | SYM         |
| abs. range:          | 0.897-1.000 |
| decay applied:       | No          |
| decay (%):           | 0.00        |
| redundants averaged: | Yes         |

\*\*\*\*\* Reflection Processing \*\*\*\*\*

|                    |       |
|--------------------|-------|
| total # processed: | 10456 |
| total # unique:    | 3514  |
| R merge (%):       | 4.12  |
| Wilson B:          | 1.81  |

\*\*\*\*\* Experimental Information \*\*\*\*\*

|                    |         |
|--------------------|---------|
| radiation:         | Cu      |
| wavelength:        | 1.54187 |
| max. 2theta:       | 136.5   |
| sin(theta)/lambda: | 0.6024  |
| temperature (C):   | -150.0  |

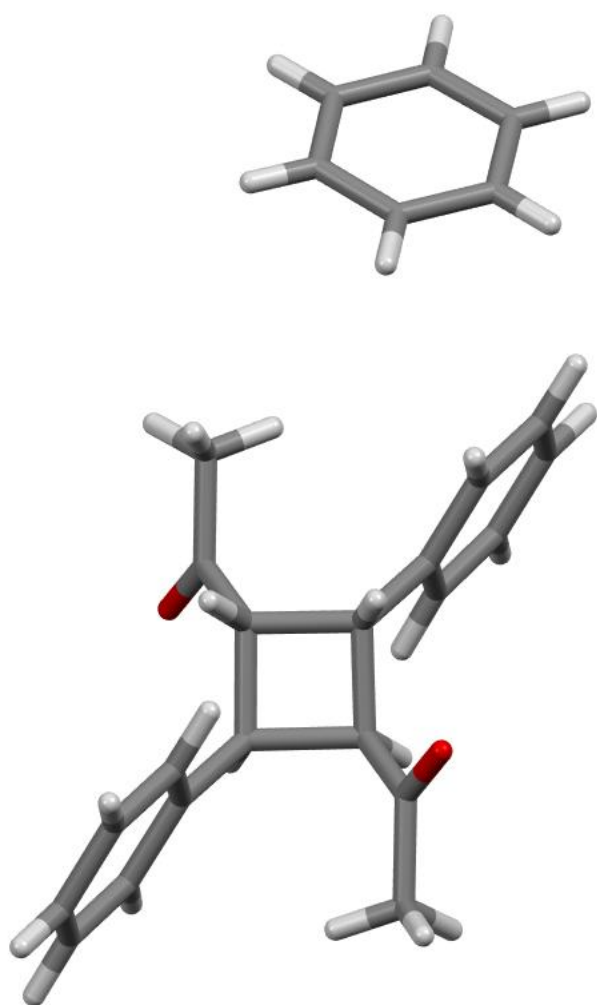



Summary for **anti-6a**

Formula: C20 H20 O2

\*\*\*\*\* Unit Cell Parameters \*\*\*\*\*

a: 9.64367(19)  
b: 16.3794(4)  
c: 11.2234(3)  
alpha: 90.000  
beta: 115.7517(13)  
gamma: 90.000  
volume: 1596.75(6)

\*\*\*\*\* Model Refinement \*\*\*\*\*

R1 factor[I>2.0sigma(I)]: 0.0401  
R factor[all data]: 0.0506  
wR factor[all data]: 0.1362  
goodness of fit: 1.166  
# of observations: 2807  
# of variables: 202  
refl/para ratio: 13.9  
maximum shift/error: 0.00  
Refinement program: SHELXL 2014/7  
Refinement mode: Single

\*\*\*\*\* Space Group Information \*\*\*\*\*

symbol: P21/n  
number: 14  
centricity: centric  
Z value: 4  
formula weight: 292.38  
calculated density: 1.216  
mu (cm-1): 6.070  
crystal system: monoclinic  
laue group: 2/m  
lattice type: P

\*\*\*\*\* Reflection Corrections \*\*\*\*\*

absorption applied: Yes  
abs. type: SYM  
abs. range: 0.824-1.000  
decay applied: No  
decay (%): 0.00  
redundants averaged: Yes

\*\*\*\*\* Reflection Processing \*\*\*\*\*

total # processed: 9890  
total # unique: 2807  
R merge (%): 3.67  
Wilson B: 1.80

\*\*\*\*\* Experimental Information \*\*\*\*\*

radiation: Cu  
wavelength: 1.54187  
max. 2theta: 136.5  
sin(theta)/lambda: 0.6023  
temperature (C): -150.0

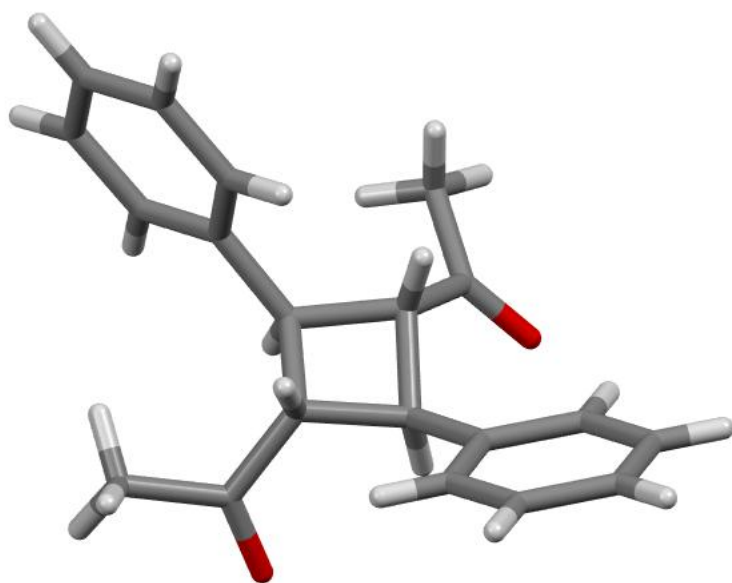

Summary for **7b**

Formula: C28 H36 N2 F2

\*\*\*\*\* Unit Cell Parameters \*\*\*\*\*

a: 9.36553(17)  
b: 10.40596(19)  
c: 12.2778(2)  
alpha: 90.000  
beta: 99.9106(11)  
gamma: 90.000  
volume: 1178.71(4)

\*\*\*\*\* Model Refinement \*\*\*\*\*

R1 factor[I>2.0sigma(I)]: 0.0355  
R factor[all data]: 0.0437  
wR factor[all data]: 0.1017  
goodness of fit: 1.121  
# of observations: 4206  
# of variables: 292  
refl/para ratio: 14.4  
maximum shift/error: 0.00  
Refinement program: SHELXL 2014/7  
Refinement mode: Single  
Flack Parameter: 0.42(19)

\*\*\*\*\* Space Group Information \*\*\*\*\*

symbol: P21  
number: 4  
centricity: acentric  
Z value: 2  
formula weight: 438.60  
calculated density: 1.236  
mu (cm-1): 6.592  
crystal system: monoclinic  
laue group: 2/m  
lattice type: P

\*\*\*\*\* Reflection Corrections \*\*\*\*\*

absorption applied: Yes  
abs. type: SYM  
abs. range: 0.907-1.000  
decay applied: No  
decay (%): 0.00  
redundants averaged: Yes

\*\*\*\*\* Reflection Processing \*\*\*\*\*

total # processed: 13488  
total # unique: 4206  
R merge (%): 3.16  
Wilson B: 1.60

\*\*\*\*\* Experimental Information \*\*\*\*\*

radiation: Cu  
wavelength: 1.54187  
max. 2theta: 136.5  
sin(theta)/lambda: 0.6023  
temperature (C): -150.0

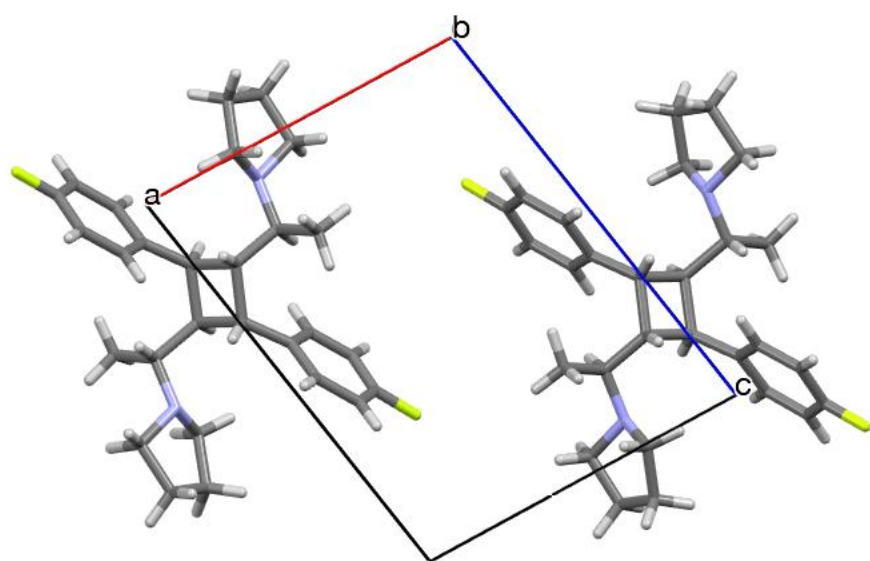

Summary for **8b**

Formula: C20 H22 O2 F2

\*\*\*\*\* Unit Cell Parameters \*\*\*\*\*

|         |          |
|---------|----------|
| a:      | 15.5432  |
| b:      | 10.8346  |
| c:      | 20.4290  |
| alpha:  | 90.000   |
| beta:   | 98.712   |
| gamma:  | 90.000   |
| volume: | 3400.656 |

\*\*\*\*\* Model Refinement \*\*\*\*\*

|                           |               |
|---------------------------|---------------|
| R1 factor[I>2.0sigma(I)]: | 0.0991        |
| R factor[all data]:       | 0.1892        |
| wR factor[all data]:      | 0.4346        |
| goodness of fit:          | 1.068         |
| # of observations:        | 6221          |
| # of variables:           | 442           |
| refl/para ratio:          | 14.1          |
| maximum shift/error:      | 0.11          |
| Refinement program:       | SHELXL 2014/7 |
| Refinement mode:          | Single        |

\*\*\*\*\* Space Group Information \*\*\*\*\*

|                     |            |
|---------------------|------------|
| symbol:             | P2/c       |
| number:             | 13         |
| centricity:         | centric    |
| Z value:            | 8          |
| formula weight:     | 332.39     |
| calculated density: | 1.298      |
| mu (cm-1):          | 8.048      |
| crystal system:     | monoclinic |
| laue group:         | 2/m        |
| lattice type:       | P          |

\*\*\*\*\* Reflection Corrections \*\*\*\*\*

|                      |             |
|----------------------|-------------|
| absorption applied:  | Yes         |
| abs. type:           | SYM         |
| abs. range:          | 0.917-1.000 |
| decay applied:       | No          |
| decay (%):           | 0.00        |
| redundants averaged: | Yes         |

\*\*\*\*\* Reflection Processing \*\*\*\*\*

|                    |       |
|--------------------|-------|
| total # processed: | 36895 |
| total # unique:    | 6221  |
| R merge (%):       | 3.93  |
| Wilson B:          | 2.71  |

\*\*\*\*\* Experimental Information \*\*\*\*\*

|                    |         |
|--------------------|---------|
| radiation:         | Cu      |
| wavelength:        | 1.54187 |
| max. 2theta:       | 136.5   |
| sin(theta)/lambda: | 0.6024  |
| temperature (C):   | -150.0  |

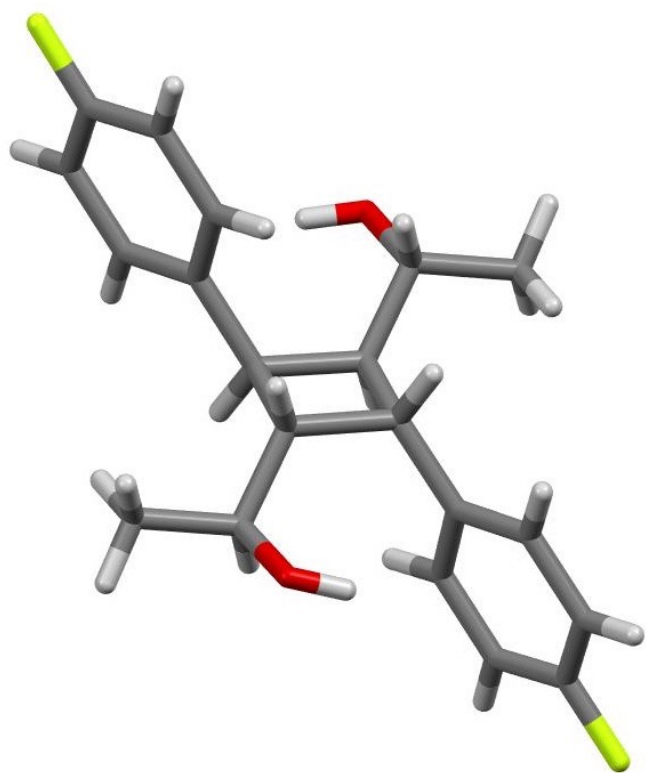

Supplement: d4cc03691c1.pdf [file d4cc03691c1.pdf]
